# Supplementary material for: Investigating hospital Mycobacterium chelonae infection using whole genome sequencing and hybrid assembly
Source: PLoS One. 2020 Nov 9;15(11):e0236533. doi: 10.1371/journal.pone.0236533 (PMC7652343; doi:10.1371/journal.pone.0236533)
Supplement: S2 Table — (XLSX) [file pone.0236533.s002.xlsx]

## Sheet: S2Table_Myco3aCoreGenes
gene_location	gene_name	number_of_SNVs_across_all_genomes	length_of_gene	snvs_per_bp
Myco3a_00097	map_1	380	768	0.494792
Myco3a_01797	group_21	595	2361	0.252012
Myco3a_04636	group_1044	267	1134	0.23545
Myco3a_01789	group_526	303	1377	0.220044
Myco3a_01286	group_301	79	381	0.207349
Myco3a_01799	group_130	157	771	0.203632
Myco3a_03784	trmL	90	462	0.194805
Myco3a_03046	group_934	93	483	0.192547
Myco3a_01245	group_2431	250	1398	0.178827
Myco3a_00219	glfT1	178	996	0.178715
Myco3a_01806	ettA_3	279	1587	0.175803
Myco3a_00261	opuBB	122	705	0.17305
Myco3a_01246	group_800	142	828	0.171498
Myco3a_03775	mfpA	97	567	0.171076
Myco3a_03047	lpd	234	1377	0.169935
Myco3a_03742	group_1727	58	342	0.169591
Myco3a_00882	cynR_1	151	891	0.169473
Myco3a_04727	group_3214	111	660	0.168182
Myco3a_01804	group_16	118	702	0.168091
Myco3a_01905	group_87	178	1059	0.168083
Myco3a_02807	group_1592	239	1428	0.167367
Myco3a_01904	group_321	100	603	0.165837
Myco3a_04455	group_1833	248	1500	0.165333
Myco3a_03184	papA3_2	234	1416	0.165254
Myco3a_03153	npt	108	654	0.165138
Myco3a_03482	group_596	165	1017	0.162242
Myco3a_04081	hemB	159	981	0.16208
Myco3a_03351	group_90	70	432	0.162037
Myco3a_03181	group_357	122	756	0.161376
Myco3a_01790	phoP	110	684	0.160819
Myco3a_02747	group_2766	123	765	0.160784
Myco3a_01925	group_325	149	927	0.160734
Myco3a_00530	group_1281	73	456	0.160088
Myco3a_03952	group_1745	239	1494	0.159973
Myco3a_01787	ugpA	138	867	0.15917
Myco3a_02770	drrA_2	143	900	0.158889
Myco3a_02119	group_205	51	324	0.157407
Myco3a_01801	yceJ	83	531	0.156309
Myco3a_01622	group_2519	312	2007	0.155456
Myco3a_04065	dipZ	123	792	0.155303
Myco3a_00081	nlhH_3	142	921	0.15418
Myco3a_02172	sigL	83	540	0.153704
Myco3a_04641	paaG	124	807	0.153656
Myco3a_04278	group_3100	178	1164	0.152921
Myco3a_04186	group_3075	128	840	0.152381
Myco3a_03785	dnaE2	497	3282	0.151432
Myco3a_02771	group_1585	120	795	0.150943
Myco3a_01936	group_2586	50	333	0.15015
Myco3a_02967	pucA	161	1074	0.149907
Myco3a_04105	group_1769	68	456	0.149123
Myco3a_02965	group_223	106	711	0.149086
Myco3a_03987	group_388	140	942	0.14862
Myco3a_01803	ddpX	99	669	0.147982
Myco3a_04274	kshA_2	177	1200	0.1475
Myco3a_03145	ribF	142	963	0.147456
Myco3a_04342	group_1023	222	1506	0.14741
Myco3a_00858	ethA_2	57	387	0.147287
Myco3a_00034	group_449	132	906	0.145695
Myco3a_02035	group_204	82	564	0.14539
Myco3a_02935	phaC	152	1050	0.144762
Myco3a_04189	yhdG_5	224	1551	0.144423
Myco3a_00266	tyrA	139	963	0.144341
Myco3a_03835	eccC_1	585	4068	0.143805
Myco3a_02036	group_59	88	612	0.143791
Myco3a_04074	yfcA_1	110	765	0.143791
Myco3a_01819	group_830	75	522	0.143678
Myco3a_03225	cdsA	127	888	0.143018
Myco3a_03838	eccB5	211	1479	0.142664
Myco3a_02748	ripA	213	1497	0.142285
Myco3a_04151	lcfB_2	224	1575	0.142222
Myco3a_01897	group_2579	181	1278	0.141628
Myco3a_03836	eccD1	216	1536	0.140625
Myco3a_00476	group_753	53	378	0.140212
Myco3a_04563	yhjE_2	188	1347	0.139569
Myco3a_01920	group_531	127	915	0.138798
Myco3a_00243	group_735	42	303	0.138614
Myco3a_04192	group_1787	276	1992	0.138554
Myco3a_04253	group_3093	143	1035	0.138164
Myco3a_03051	mce2R	102	741	0.137652
Myco3a_01764	lprN_1	157	1146	0.136998
Myco3a_01800	glcA_1	113	825	0.13697
Myco3a_03536	pnbA_5	206	1506	0.136786
Myco3a_01788	tldD	207	1515	0.136634
Myco3a_00473	sufS_2	181	1326	0.136501
Myco3a_01909	hoxN	146	1071	0.136321
Myco3a_04655	group_1047	126	927	0.135922
Myco3a_01924	group_1471	66	486	0.135802
Myco3a_00462	group_280	76	564	0.134752
Myco3a_00270	group_739	40	297	0.13468
Myco3a_01831	group_831	110	819	0.13431
Myco3a_04420	group_1827	196	1461	0.134155
Myco3a_04062	group_1762	204	1524	0.133858
Myco3a_01786	araQ	109	816	0.133578
Myco3a_00439	group_173	112	840	0.133333
Myco3a_03063	group_356	140	1050	0.133333
Myco3a_03309	rutA	118	885	0.133333
Myco3a_04130	group_3058	138	1035	0.133333
Myco3a_00268	tadA_1	61	459	0.132898
Myco3a_04064	ccs1	212	1596	0.132832
Myco3a_03450	rskA	96	723	0.13278
Myco3a_02815	group_2779	90	678	0.132743
Myco3a_01763	group_1448	147	1110	0.132432
Myco3a_02446	yxaF_2	79	597	0.132328
Myco3a_03007	group_61	57	432	0.131944
Myco3a_04054	mtnP	102	774	0.131783
Myco3a_00220	btuD_4	100	759	0.131752
Myco3a_04070	group_3046	49	372	0.13172
Myco3a_01716	group_1438	204	1551	0.131528
Myco3a_01784	group_16757	106	807	0.131351
Myco3a_04063	ccsA	128	975	0.131282
Myco3a_00475	ephD_10	126	960	0.13125
Myco3a_04909	group_3260	111	846	0.131206
Myco3a_03477	group_370	59	450	0.131111
Myco3a_01938	prrA_2	93	711	0.130802
Myco3a_00218	group_1225	109	834	0.130695
Myco3a_03076	dmsA	299	2292	0.130454
Myco3a_00147	group_2178	202	1554	0.129987
Myco3a_04700	group_643	69	531	0.129944
Myco3a_03456	cmaA1_2	116	894	0.129754
Myco3a_00004	recF	155	1200	0.129167
Myco3a_04254	group_3094	155	1200	0.129167
Myco3a_02563	group_342	36	279	0.129032
Myco3a_02926	group_145	175	1365	0.128205
Myco3a_00884	group_774	48	375	0.128
Myco3a_00082	group_451	33	258	0.127907
Myco3a_04082	cysG_1	211	1650	0.127879
Myco3a_04280	group_1800	150	1173	0.127877
Myco3a_02620	group_343	69	540	0.127778
Myco3a_04438	group_1830	77	603	0.127695
Myco3a_02964	group_42	31	243	0.127572
Myco3a_01591	group_817	44	345	0.127536
Myco3a_00369	egtD	122	957	0.127482
Myco3a_00025	group_262	73	573	0.1274
Myco3a_03762	icd	285	2238	0.127346
Myco3a_00230	group_461	102	801	0.127341
Myco3a_02769	group_1584	238	1869	0.127341
Myco3a_02930	yabJ	50	393	0.127226
Myco3a_04279	fabG_1	100	786	0.127226
Myco3a_01162	group_17287	111	873	0.127148
Myco3a_01288	mmcO	193	1524	0.12664
Myco3a_03800	group_379	36	285	0.126316
Myco3a_01465	group_2490	62	492	0.126016
Myco3a_00896	mlaE_1	108	858	0.125874
Myco3a_03147	group_1627	72	573	0.125654
Myco3a_01028	ohrR	62	495	0.125253
Myco3a_01894	group_202	62	495	0.125253
Myco3a_02274	group_854	168	1347	0.124722
Myco3a_03719	azr	77	618	0.124595
Myco3a_01721	cysA_1	127	1020	0.12451
Myco3a_03546	group_970	78	627	0.124402
Myco3a_01922	group_324	153	1230	0.12439
Myco3a_01233	group_799	25	201	0.124378
Myco3a_01714	group_523	144	1158	0.124352
Myco3a_04507	group_636	54	435	0.124138
Myco3a_02639	group_218	89	717	0.124128
Myco3a_00189	glfT2	242	1953	0.123912
Myco3a_02931	group_916	129	1044	0.123563
Myco3a_02555	group_894	53	429	0.123543
Myco3a_04255	group_17073	106	861	0.123113
Myco3a_01299	group_1377	60	489	0.122699
Myco3a_02623	group_568	87	711	0.122363
Myco3a_01732	rsmE	98	801	0.122347
Myco3a_03722	group_1129	160	1308	0.122324
Myco3a_00848	group_1322	102	834	0.122302
Myco3a_00039	group_2155	99	810	0.122222
Myco3a_01809	prtS	126	1032	0.122093
Myco3a_00146	ddn_5	56	459	0.122004
Myco3a_00873	group_1331	71	582	0.121993
Myco3a_04412	pkn1	109	894	0.121924
Myco3a_00380	glpK	185	1518	0.121871
Myco3a_00235	group_2192	155	1272	0.121855
Myco3a_01023	group_788	110	903	0.121816
Myco3a_04104	ddn_1	54	444	0.121622
Myco3a_03154	group_1631	116	954	0.121593
Myco3a_00397	group_1255	87	717	0.121339
Myco3a_03508	sir2	91	750	0.121333
Myco3a_03558	group_971	189	1563	0.120921
Myco3a_01344	group_512	37	306	0.120915
Myco3a_04447	group_3140	152	1260	0.120635
Myco3a_02925	group_573	52	432	0.12037
Myco3a_03146	mntR	87	723	0.120332
Myco3a_03568	group_972	80	666	0.12012
Myco3a_03426	group_232	50	417	0.119904
Myco3a_00883	group_17455	142	1185	0.119831
Myco3a_01623	atzF	197	1644	0.11983
Myco3a_04060	group_3040	37	309	0.119741
Myco3a_01711	group_522	94	786	0.119593
Myco3a_03274	ffh	188	1572	0.119593
Myco3a_02551	group_563	82	687	0.11936
Myco3a_01910	group_322	97	813	0.119311
Myco3a_00288	group_740	116	975	0.118974
Myco3a_00276	tgt	145	1221	0.118755
Myco3a_03016	msrB	47	396	0.118687
Myco3a_04256	group_16898	91	768	0.11849
Myco3a_00037	group_1195	50	423	0.118203
Myco3a_03433	group_16158	39	330	0.118182
Myco3a_03901	pdxH_2	79	669	0.118087
Myco3a_04069	group_3045	46	390	0.117949
Myco3a_01770	group_315	77	654	0.117737
Myco3a_01694	group_1435	156	1326	0.117647
Myco3a_03505	kmo_2	145	1236	0.117314
Myco3a_02438	group_545	52	444	0.117117
Myco3a_04899	dnaB	161	1377	0.116921
Myco3a_02104	pspA	81	693	0.116883
Myco3a_02884	group_2799	106	909	0.116612
Myco3a_01313	group_1378	99	849	0.116608
Myco3a_00440	group_2246	43	369	0.116531
Myco3a_01036	group_1349	36	309	0.116505
Myco3a_03585	group_238	51	438	0.116438
Myco3a_04075	ctpA	253	2178	0.116162
Myco3a_00036	group_1194	104	900	0.115556
Myco3a_00803	group_771	36	312	0.115385
Myco3a_04910	group_3261	63	546	0.115385
Myco3a_01760	group_1446	174	1509	0.115308
Myco3a_00148	group_264	57	495	0.115152
Myco3a_02100	group_534	30	261	0.114943
Myco3a_04158	group_391	51	444	0.114865
Myco3a_01138	group_298	138	1206	0.114428
Myco3a_03716	group_2968	47	411	0.114355
Myco3a_03474	group_1678	100	876	0.114155
Myco3a_04474	aac_2	64	561	0.114082
Myco3a_00441	group_1260	105	921	0.114007
Myco3a_00140	group_17474	40	351	0.11396
Myco3a_04185	group_1967	82	720	0.113889
Myco3a_00354	group_1247	70	615	0.113821
Myco3a_01204	group_2419	42	369	0.113821
Myco3a_04187	umaA	99	870	0.113793
Myco3a_04459	acsA_1	214	1884	0.113588
Myco3a_04133	group_3059	92	810	0.11358
Myco3a_04261	group_1021	171	1506	0.113546
Myco3a_01917	group_2584	82	723	0.113416
Myco3a_01297	group_304	175	1545	0.113269
Myco3a_03940	group_384	83	735	0.112925
Myco3a_02622	group_567	48	426	0.112676
Myco3a_04257	group_1793	102	906	0.112583
Myco3a_04643	group_3194	62	552	0.112319
Myco3a_01128	group_505	103	918	0.1122
Myco3a_00217	group_458	75	669	0.112108
Myco3a_01915	group_323	114	1017	0.112094
Myco3a_03814	tsaD	115	1026	0.112086
Myco3a_02343	argH	158	1410	0.112057
Myco3a_02767	group_2771	160	1428	0.112045
Myco3a_01919	group_1470	90	804	0.11194
Myco3a_03545	ddn_6	48	429	0.111888
Myco3a_04912	group_418	96	858	0.111888
Myco3a_04435	group_3137	101	903	0.111849
Myco3a_01653	fabR_2	82	735	0.111565
Myco3a_01239	group_2429	84	753	0.111554
Myco3a_00229	group_459	58	522	0.111111
Myco3a_00559	caiA_2	106	954	0.111111
Myco3a_01717	group_314	29	261	0.111111
Myco3a_03236	group_1105	27	243	0.111111
Myco3a_04180	group_1783	42	378	0.111111
Myco3a_04657	group_1860	99	894	0.110738
Myco3a_03117	group_2841	97	876	0.110731
Myco3a_02427	group_544	66	597	0.110553
Myco3a_04252	group_17150	117	1059	0.110482
Myco3a_02928	panE	112	1014	0.110454
Myco3a_03290	kdpB	229	2076	0.110308
Myco3a_01536	phnV	88	798	0.110276
Myco3a_00597	mrpG	36	327	0.110092
Myco3a_00041	pknB	207	1887	0.109698
Myco3a_00026	eryG	101	921	0.109663
Myco3a_00003	group_16167	98	894	0.10962
Myco3a_02546	arsC_2	45	411	0.109489
Myco3a_01645	clpP1	65	594	0.109428
Myco3a_01963	cobS	83	759	0.109354
Myco3a_02641	rfbC	61	558	0.109319
Myco3a_03579	group_94	39	357	0.109244
Myco3a_04645	kstR2_1	75	687	0.10917
Myco3a_00195	group_2181	107	981	0.109072
Myco3a_00708	group_2305	50	459	0.108932
Myco3a_04482	cut3_3	80	735	0.108844
Myco3a_02326	group_1521	60	552	0.108696
Myco3a_04134	group_623	60	552	0.108696
Myco3a_01750	ddc	164	1509	0.108681
Myco3a_01242	group_1369	133	1224	0.10866
Myco3a_00098	group_454	29	267	0.108614
Myco3a_04343	group_1817	325	2994	0.10855
Myco3a_02805	eutC_2	84	774	0.108527
Myco3a_04007	group_3029	93	858	0.108392
Myco3a_00084	ksdD	185	1707	0.108377
Myco3a_02106	group_844	90	831	0.108303
Myco3a_00590	tesE	85	786	0.108142
Myco3a_04283	cysD_3	103	954	0.107966
Myco3a_00109	group_1207	128	1188	0.107744
Myco3a_04106	group_17422	84	780	0.107692
Myco3a_02978	group_921	104	966	0.10766
Myco3a_01440	group_2482	204	1896	0.107595
Myco3a_00611	group_484	101	939	0.107561
Myco3a_03043	group_62	101	939	0.107561
Myco3a_03743	group_377	80	744	0.107527
Myco3a_03883	rpsZ	20	186	0.107527
Myco3a_04881	group_3256	117	1089	0.107438
Myco3a_04068	hemL	144	1341	0.107383
Myco3a_00857	ald1	163	1518	0.107378
Myco3a_01832	group_832	57	531	0.107345
Myco3a_00517	menH_6	85	792	0.107323
Myco3a_00290	ncsB2	168	1566	0.10728
Myco3a_04533	group_3161	139	1296	0.107253
Myco3a_03539	fadA_4	128	1194	0.107203
Myco3a_00080	group_1204	91	849	0.107185
Myco3a_04434	group_16907	127	1185	0.107173
Myco3a_02927	group_2806	117	1092	0.107143
Myco3a_03606	group_1704	78	729	0.106996
Myco3a_01690	comEA	85	795	0.106918
Myco3a_01553	betI_2	67	627	0.106858
Myco3a_03110	group_1623	58	543	0.106814
Myco3a_02890	group_572	40	375	0.106667
Myco3a_02332	alkA	158	1482	0.106613
Myco3a_01769	acdS	109	1023	0.106549
Myco3a_01951	group_1476	131	1230	0.106504
Myco3a_04091	group_1009	30	282	0.106383
Myco3a_00370	egtE	112	1053	0.106363
Myco3a_01214	group_2422	110	1035	0.10628
Myco3a_01753	group_2558	80	753	0.106242
Myco3a_04050	group_1006	122	1149	0.106179
Myco3a_02097	dapE_2	142	1338	0.106129
Myco3a_00035	group_263	98	924	0.106061
Myco3a_03313	group_589	77	726	0.106061
Myco3a_03958	group_617	146	1377	0.106028
Myco3a_04445	menH_1	100	945	0.10582
Myco3a_02924	group_1607	33	312	0.105769
Myco3a_02734	group_905	39	369	0.105691
Myco3a_01818	tdh_2	103	975	0.105641
Myco3a_03052	group_2831	70	663	0.105581
Myco3a_01136	rplY	69	654	0.105505
Myco3a_01144	group_1360	25	237	0.105485
Myco3a_04446	group_633	49	465	0.105376
Myco3a_03432	group_368	55	522	0.105364
Myco3a_04273	yrdA	55	522	0.105364
Myco3a_03180	group_950	204	1938	0.105263
Myco3a_04534	group_1039	78	741	0.105263
Myco3a_02455	group_547	82	780	0.105128
Myco3a_03390	group_592	81	771	0.105058
Myco3a_00145	group_1213	86	819	0.105006
Myco3a_00072	group_717	131	1248	0.104968
Myco3a_03604	lipV	82	783	0.104725
Myco3a_04810	group_645	38	363	0.104683
Myco3a_03982	group_154	27	258	0.104651
Myco3a_01943	group_2588	43	411	0.104623
Myco3a_03504	rebH	161	1539	0.104613
Myco3a_03542	group_17365	95	909	0.10451
Myco3a_03050	rutC	42	402	0.104478
Myco3a_01163	group_2410	124	1188	0.104377
Myco3a_03062	ideR	72	690	0.104348
Myco3a_00499	folK	56	537	0.104283
Myco3a_04407	group_1824	71	681	0.104258
Myco3a_01166	group_17396	192	1842	0.104235
Myco3a_03600	nudC	94	903	0.104097
Myco3a_02701	group_60	74	711	0.104079
Myco3a_01291	group_510	44	423	0.104019
Myco3a_01772	dgt	134	1290	0.103876
Myco3a_02276	group_542	95	915	0.103825
Myco3a_02699	gltC_3	95	915	0.103825
Myco3a_04018	group_3032	102	984	0.103659
Myco3a_02741	hemH	106	1023	0.103617
Myco3a_02672	mmpS5_3	46	444	0.103604
Myco3a_00837	group_1320	151	1458	0.103567
Myco3a_03141	group_2845	136	1314	0.103501
Myco3a_00102	group_2170	163	1575	0.103492
Myco3a_02098	group_17545	54	522	0.103448
Myco3a_04376	group_1027	107	1035	0.103382
Myco3a_02451	group_1540	49	474	0.103376
Myco3a_01759	mlaE_3	89	861	0.103368
Myco3a_02885	aspS	185	1791	0.103294
Myco3a_03452	group_1673	81	786	0.103053
Myco3a_04477	group_3151	68	660	0.10303
Myco3a_03302	group_2879	55	534	0.102996
Myco3a_00260	btuD_2	114	1107	0.102981
Myco3a_01742	group_2553	42	408	0.102941
Myco3a_04265	group_3097	63	612	0.102941
Myco3a_04627	lemA	63	612	0.102941
Myco3a_04260	group_1795	113	1098	0.102914
Myco3a_02549	group_893	37	360	0.102778
Myco3a_00262	opuCB_1	78	759	0.102767
Myco3a_03721	lrp_1	49	477	0.102725
Myco3a_03908	group_994	143	1395	0.102509
Myco3a_01990	pimB	123	1200	0.1025
Myco3a_00264	group_2058	83	810	0.102469
Myco3a_00184	group_2179	67	654	0.102446
Myco3a_01559	group_2508	132	1290	0.102326
Myco3a_04539	group_3162	132	1290	0.102326
Myco3a_03963	group_999	163	1593	0.102323
Myco3a_02968	xdhA	277	2709	0.102252
Myco3a_02341	argR	50	489	0.102249
Myco3a_01916	group_1468	115	1125	0.102222
Myco3a_04916	kstR2_2	68	666	0.102102
Myco3a_01135	pth	60	588	0.102041
Myco3a_00853	rutA_1	93	912	0.101974
Myco3a_00394	group_115	78	765	0.101961
Myco3a_04286	sodC	73	717	0.101813
Myco3a_04191	group_3077	62	609	0.101806
Myco3a_02721	ansA	102	1002	0.101796
Myco3a_01098	group_296	91	894	0.10179
Myco3a_01928	group_2585	149	1464	0.101776
Myco3a_02626	group_217	72	708	0.101695
Myco3a_02278	group_1514	64	630	0.101587
Myco3a_00872	group_1330	124	1221	0.101556
Myco3a_01296	group_802	53	522	0.101533
Myco3a_04043	group_1004	67	660	0.101515
Myco3a_04703	group_17201	80	792	0.10101
Myco3a_03855	group_987	53	525	0.100952
Myco3a_00293	pcaB	139	1377	0.100944
Myco3a_04033	group_1757	33	327	0.100917
Myco3a_02114	group_845	89	882	0.100907
Myco3a_00320	cbiA	72	714	0.10084
Myco3a_01584	group_2516	121	1200	0.100833
Myco3a_01765	group_17484	121	1200	0.100833
Myco3a_01033	mntH_1	124	1230	0.100813
Myco3a_00278	mltF	144	1431	0.100629
Myco3a_02564	group_143	53	528	0.100379
Myco3a_01728	hemN	118	1176	0.10034
Myco3a_01749	dat	136	1356	0.100295
Myco3a_03493	group_964	89	888	0.100225
Myco3a_00070	group_1202	92	918	0.100218
Myco3a_01805	group_319	95	948	0.100211
Myco3a_01965	cobP	52	519	0.100193
Myco3a_04476	group_3150	67	669	0.100149
Myco3a_04463	kipR	78	780	0.1
Myco3a_03428	rhtA_2	83	831	0.0998797
Myco3a_02760	group_1583	76	762	0.0997375
Myco3a_01656	group_1431	233	2337	0.0997005
Myco3a_03125	folA	49	492	0.0995935
Myco3a_03130	dapB	46	462	0.0995671
Myco3a_04580	group_3461	112	1125	0.0995556
Myco3a_00095	gltD	146	1467	0.0995228
Myco3a_02640	galE	102	1026	0.0994152
Myco3a_03424	group_2905	51	513	0.0994152
Myco3a_01356	dapE_1	107	1077	0.09935
Myco3a_03232	group_2866	59	594	0.0993266
Myco3a_04116	pobB_1	112	1128	0.0992908
Myco3a_00197	group_2182	190	1914	0.0992685
Myco3a_03871	group_3002	122	1230	0.099187
Myco3a_00885	fadI_1	127	1281	0.0991413
Myco3a_01530	group_1415	52	525	0.0990476
Myco3a_04494	group_16316	49	495	0.0989899
Myco3a_00403	sbnA	106	1071	0.0989729
Myco3a_04837	cdhR_2	95	960	0.0989583
Myco3a_00487	gutB	102	1032	0.0988372
Myco3a_03124	group_946	67	678	0.0988201
Myco3a_02817	group_2780	72	729	0.0987654
Myco3a_03503	rebO	149	1509	0.0987409
Myco3a_04442	group_711	93	942	0.0987261
Myco3a_02652	kat	132	1338	0.0986547
Myco3a_00600	mrpD	158	1602	0.0986267
Myco3a_01531	dadA	111	1128	0.0984043
Myco3a_00750	group_1308	80	813	0.098401
Myco3a_01588	yhgF	231	2349	0.0983397
Myco3a_02975	group_17296	192	1953	0.0983103
Myco3a_00357	group_2230	65	663	0.0980392
Myco3a_00808	group_1316	40	408	0.0980392
Myco3a_02907	group_1603	60	612	0.0980392
Myco3a_03534	pgm	160	1632	0.0980392
Myco3a_02674	hit	42	429	0.0979021
Myco3a_03031	sigI	86	879	0.0978385
Myco3a_00275	group_2205	54	552	0.0978261
Myco3a_01525	group_2504	54	552	0.0978261
Myco3a_04035	group_1758	44	450	0.0977778
Myco3a_00794	group_52	68	696	0.0977011
Myco3a_03024	group_931	114	1167	0.0976864
Myco3a_00835	stp_1	138	1413	0.0976645
Myco3a_01923	group_17299	94	963	0.0976116
Myco3a_02418	group_866	71	729	0.0973937
Myco3a_00062	group_2160	118	1212	0.0973597
Myco3a_01534	phnT	118	1212	0.0973597
Myco3a_03194	cobB	132	1356	0.0973451
Myco3a_01029	group_2378	40	411	0.0973236
Myco3a_04437	group_3138	91	936	0.0972222
Myco3a_02814	group_2778	55	567	0.0970018
Myco3a_04032	menC	96	990	0.0969697
Myco3a_04918	group_1891	66	681	0.0969163
Myco3a_02426	norW	141	1455	0.0969072
Myco3a_01674	rpmA	25	258	0.0968992
Myco3a_00424	gsiC	102	1053	0.0968661
Myco3a_01058	dapA_1	86	888	0.0968468
Myco3a_00746	bdcA	72	744	0.0967742
Myco3a_03045	ogt_2	54	558	0.0967742
Myco3a_01715	group_1437	40	414	0.0966184
Myco3a_00463	cocE_3	159	1647	0.0965392
Myco3a_04483	group_1837	311	3222	0.0965239
Myco3a_00367	egtB	125	1296	0.0964506
Myco3a_02160	group_17038	78	810	0.0962963
Myco3a_03925	group_3013	130	1350	0.0962963
Myco3a_02970	group_1612	132	1371	0.0962801
Myco3a_03540	group_969	41	426	0.0962441
Myco3a_01320	group_17342	99	1029	0.0962099
Myco3a_03197	group_585	43	447	0.0961969
Myco3a_02254	dhbE	160	1665	0.0960961
Myco3a_03966	group_3020	117	1218	0.0960591
Myco3a_02758	trxC	34	354	0.0960452
Myco3a_00802	rlmB_1	78	813	0.095941
Myco3a_01927	rnr	137	1428	0.0959384
Myco3a_04789	trkA_1	65	678	0.0958702
Myco3a_00392	group_17574	67	699	0.0958512
Myco3a_00002	dnaN	115	1200	0.0958333
Myco3a_01713	group_2544	50	522	0.0957854
Myco3a_00190	group_1220	54	564	0.0957447
Myco3a_00350	group_2229	62	648	0.095679
Myco3a_02973	hiuH	31	324	0.095679
Myco3a_04472	ybgJ	62	648	0.095679
Myco3a_02643	celB	95	993	0.0956697
Myco3a_04702	group_1865	82	858	0.0955711
Myco3a_04862	cenA	86	900	0.0955556
Myco3a_01773	dnaG	182	1905	0.0955381
Myco3a_02826	group_16664	134	1404	0.0954416
Myco3a_01533	phnS	99	1038	0.0953757
Myco3a_01035	ligD_1	217	2277	0.0953008
Myco3a_00886	group_2353	76	798	0.0952381
Myco3a_01454	group_1402	54	567	0.0952381
Myco3a_01509	cysO	26	273	0.0952381
Myco3a_02682	hisC_1	108	1134	0.0952381
Myco3a_02863	tam_1	74	777	0.0952381
Myco3a_04489	gntR	66	693	0.0952381
Myco3a_00277	group_17479	117	1230	0.095122
Myco3a_04818	dauA_2	105	1104	0.0951087
Myco3a_00546	group_2262	201	2118	0.0949008
Myco3a_02988	hsrA	150	1581	0.0948767
Myco3a_00676	group_17003	171	1803	0.0948419
Myco3a_00787	group_2333	124	1308	0.0948012
Myco3a_00292	group_17372	184	1941	0.0947965
Myco3a_04697	group_642	56	591	0.0947547
Myco3a_04013	group_3031	77	813	0.0947109
Myco3a_04677	group_3202	90	951	0.0946372
Myco3a_01573	group_3652	128	1353	0.0946046
Myco3a_00363	fgd_1	84	888	0.0945946
Myco3a_02229	group_2660	84	888	0.0945946
Myco3a_00751	group_2321	61	645	0.0945736
Myco3a_03816	group_986	59	624	0.0945513
Myco3a_00291	xlnD_1	114	1206	0.0945274
Myco3a_04558	mshA_2	112	1185	0.0945148
Myco3a_02910	pdxT	55	582	0.0945017
Myco3a_01384	mcl1_1	91	963	0.0944964
Myco3a_01649	group_2526	51	540	0.0944444
Myco3a_00304	group_1237	64	678	0.0943953
Myco3a_01912	group_2582	77	816	0.0943627
Myco3a_00299	phzD	60	636	0.0943396
Myco3a_03767	group_1732	30	318	0.0943396
Myco3a_03502	dnrF	148	1569	0.0943276
Myco3a_03471	group_2914	58	615	0.0943089
Myco3a_03689	maf	160	1698	0.0942285
Myco3a_03760	exoA	78	828	0.0942029
Myco3a_00631	group_2283	76	807	0.094176
Myco3a_02359	tlyA	76	807	0.094176
Myco3a_04825	mmpL4_6	263	2793	0.094164
Myco3a_00389	group_468	61	648	0.0941358
Myco3a_02283	group_2677	94	999	0.0940941
Myco3a_04345	metZ	116	1233	0.0940795
Myco3a_03032	azoB	81	861	0.0940767
Myco3a_02811	ribH	46	489	0.0940695
Myco3a_00236	pat_2	98	1044	0.0938697
Myco3a_00074	sseB	78	831	0.0938628
Myco3a_00483	group_2254	145	1545	0.0938511
Myco3a_02243	irtA_2	67	714	0.0938375
Myco3a_03312	group_2882	67	714	0.0938375
Myco3a_02934	group_575	118	1260	0.0936508
Myco3a_01766	group_2559	84	897	0.0936455
Myco3a_04886	group_656	107	1143	0.0936133
Myco3a_04828	group_3243	57	609	0.0935961
Myco3a_00090	phoA	146	1560	0.0935897
Myco3a_04628	group_3189	64	684	0.0935673
Myco3a_03583	group_17323	71	759	0.0935441
Myco3a_02105	group_17093	55	588	0.0935374
Myco3a_04439	group_17357	55	588	0.0935374
Myco3a_04817	hipO	117	1251	0.0935252
Myco3a_03483	group_1681	46	492	0.0934959
Myco3a_04603	pepO_2	184	1968	0.0934959
Myco3a_03603	rep_2	297	3177	0.0934844
Myco3a_00538	group_756	67	717	0.0934449
Myco3a_03937	group_616	67	717	0.0934449
Myco3a_01202	group_1365	44	471	0.0934183
Myco3a_01813	malP	232	2484	0.0933977
Myco3a_00748	group_765	56	600	0.0933333
Myco3a_02034	group_1486	91	975	0.0933333
Myco3a_04781	uvrA_1	222	2379	0.0933165
Myco3a_01160	ppx2	89	954	0.0932914
Myco3a_03300	group_957	87	933	0.0932476
Myco3a_03189	group_2856	59	633	0.093207
Myco3a_04555	group_161	111	1191	0.093199
Myco3a_03984	dps	52	558	0.09319
Myco3a_00138	group_2177	97	1041	0.0931796
Myco3a_04100	group_1767	116	1245	0.0931727
Myco3a_01532	phnX	64	687	0.0931587
Myco3a_02350	group_860	19	204	0.0931373
Myco3a_01050	ord_2	98	1053	0.0930674
Myco3a_04522	yedY	139	1494	0.0930388
Myco3a_00028	group_2153	89	957	0.092999
Myco3a_03293	fpg1	77	828	0.0929952
Myco3a_02162	cocE_2	183	1968	0.0929878
Myco3a_01555	mmpL1	270	2904	0.0929752
Myco3a_00059	group_3715	361	3885	0.0929215
Myco3a_02281	group_330	68	732	0.0928962
Myco3a_02728	group_904	51	549	0.0928962
Myco3a_00752	paaF_1	73	786	0.0928753
Myco3a_02692	nadB	146	1572	0.0928753
Myco3a_02284	group_856	117	1260	0.0928571
Myco3a_00569	group_17411	100	1077	0.0928505
Myco3a_00192	aftB	188	2025	0.0928395
Myco3a_00830	entS	105	1131	0.0928382
Myco3a_04155	group_3065	115	1239	0.0928168
Myco3a_04448	group_16302	155	1671	0.0927588
Myco3a_02806	eutB_2	131	1413	0.0927105
Myco3a_00785	mog	45	486	0.0925926
Myco3a_01103	nimR_2	70	756	0.0925926
Myco3a_01241	group_17311	35	378	0.0925926
Myco3a_02425	ureD	60	648	0.0925926
Myco3a_03106	pgsA2	55	594	0.0925926
Myco3a_04562	geoB	135	1458	0.0925926
Myco3a_03795	group_985	68	735	0.092517
Myco3a_00233	sufS_1	174	1881	0.092504
Myco3a_00388	group_1254	106	1146	0.0924956
Myco3a_04865	ettA_4	154	1665	0.0924925
Myco3a_02272	group_1513	195	2109	0.0924609
Myco3a_01771	group_2561	188	2034	0.0924287
Myco3a_03333	group_958	28	303	0.0924092
Myco3a_01118	yjlD	107	1158	0.0924007
Myco3a_01269	dthadh	100	1083	0.0923361
Myco3a_01240	group_2430	80	867	0.0922722
Myco3a_01293	mdtH	117	1269	0.0921986
Myco3a_01964	cobT	94	1020	0.0921569
Myco3a_00850	group_1324	97	1053	0.0921178
Myco3a_01724	cysNC_2	118	1281	0.0921155
Myco3a_01582	group_1427	85	924	0.0919913
Myco3a_00100	ycdX	93	1011	0.0919881
Myco3a_03764	metXA	109	1185	0.0919831
Myco3a_01051	fgd_3	78	849	0.0918728
Myco3a_01238	ald_1	135	1470	0.0918367
Myco3a_00788	group_490	65	708	0.0918079
Myco3a_02310	group_1519	133	1449	0.0917874
Myco3a_02892	hisS	117	1275	0.0917647
Myco3a_04111	mca_2	79	861	0.0917538
Myco3a_00124	glpE	30	327	0.0917431
Myco3a_02423	ureF	60	654	0.0917431
Myco3a_03806	group_435	131	1428	0.0917367
Myco3a_02371	cmk	63	687	0.0917031
Myco3a_04103	group_1768	55	600	0.0916667
Myco3a_04334	group_1815	102	1113	0.0916442
Myco3a_04554	aftD	389	4245	0.0916372
Myco3a_02578	yaeQ	58	633	0.0916272
Myco3a_01748	group_16888	97	1059	0.0915958
Myco3a_03018	hemY	126	1377	0.0915033
Myco3a_01310	group_2447	59	645	0.0914729
Myco3a_01420	group_1397	125	1368	0.0913743
Myco3a_03923	group_17448	74	810	0.091358
Myco3a_03174	group_2851	43	471	0.0912951
Myco3a_03744	group_2978	89	975	0.0912821
Myco3a_02919	cdhR_4	92	1008	0.0912698
Myco3a_03142	pnp	207	2268	0.0912698
Myco3a_04404	rkpK	130	1425	0.0912281
Myco3a_03728	group_2974	55	603	0.0912106
Myco3a_02107	group_2006	82	900	0.0911111
Myco3a_03133	group_16882	205	2250	0.0911111
Myco3a_00537	group_755	91	999	0.0910911
Myco3a_04820	ppc	254	2790	0.0910394
Myco3a_02841	group_912	120	1320	0.0909091
Myco3a_04866	group_1069	63	693	0.0909091
Myco3a_01353	lcfB_1	127	1398	0.0908441
Myco3a_01626	gdh_1	440	4845	0.0908153
Myco3a_01054	yihU	79	870	0.0908046
Myco3a_04199	gap_1	73	804	0.090796
Myco3a_02659	lysX_1	128	1410	0.0907801
Myco3a_01677	group_1434	58	639	0.0907668
Myco3a_03559	group_17431	55	606	0.0907591
Myco3a_02655	cydD	151	1665	0.0906907
Myco3a_03013	group_930	71	783	0.0906769
Myco3a_03821	nnr	130	1434	0.0906555
Myco3a_02705	bioD	62	684	0.0906433
Myco3a_00443	group_17344	87	960	0.090625
Myco3a_04246	otsA	137	1512	0.0906085
Myco3a_04401	group_1142	215	2373	0.0906026
Myco3a_02144	nuoE	69	762	0.0905512
Myco3a_00222	group_2188	179	1977	0.0905412
Myco3a_01223	group_16892	38	420	0.0904762
Myco3a_03869	group_3001	143	1581	0.0904491
Myco3a_00498	folB	35	387	0.0904393
Myco3a_00679	group_1299	35	387	0.0904393
Myco3a_00040	trpG	61	675	0.0903704
Myco3a_01092	group_2391	61	675	0.0903704
Myco3a_01411	stp_2	129	1428	0.0903361
Myco3a_04662	group_17482	75	831	0.0902527
Myco3a_01746	group_2554	108	1197	0.0902256
Myco3a_00123	msrA	69	765	0.0901961
Myco3a_02687	dcuS	161	1785	0.0901961
Myco3a_02015	murE	142	1575	0.0901587
Myco3a_02780	qorA_3	90	999	0.0900901
Myco3a_01115	menF_1	114	1266	0.0900474
Myco3a_01664	kmo_1	104	1155	0.0900433
Myco3a_02363	mctB	84	933	0.0900322
Myco3a_03756	group_982	91	1011	0.0900099
Myco3a_04602	group_405	54	600	0.09
Myco3a_01449	group_308	34	378	0.0899471
Myco3a_04687	group_1862	102	1134	0.0899471
Myco3a_01834	rutD_2	75	834	0.0899281
Myco3a_00099	group_721	120	1335	0.0898876
Myco3a_03030	group_579	76	846	0.0898345
Myco3a_01148	lysA_1	121	1347	0.0898293
Myco3a_00704	group_1304	52	579	0.08981
Myco3a_00709	group_2306	42	468	0.0897436
Myco3a_01693	group_2538	127	1416	0.0896893
Myco3a_01758	mlaE_2	78	870	0.0896552
Myco3a_02736	group_2764	117	1305	0.0896552
Myco3a_03573	hisN	71	792	0.0896465
Myco3a_02902	ruvB	96	1071	0.0896359
Myco3a_04836	group_3245	57	636	0.0896226
Myco3a_01451	group_1401	36	402	0.0895522
Myco3a_01439	group_2481	47	525	0.0895238
Myco3a_04565	group_1849	87	972	0.0895062
Myco3a_00705	group_486	51	570	0.0894737
Myco3a_03239	mmpL9_2	263	2940	0.0894558
Myco3a_00384	group_1253	77	861	0.0894309
Myco3a_04954	rsmG	63	705	0.0893617
Myco3a_02355	ybiT_2	151	1692	0.0892435
Myco3a_02447	group_1539	34	381	0.0892388
Myco3a_02842	pyrF	73	819	0.0891331
Myco3a_02783	tal	101	1134	0.0890653
Myco3a_03859	rmlC	55	618	0.0889968
Myco3a_01055	cetB	44	495	0.0888889
Myco3a_01911	cobD	84	945	0.0888889
Myco3a_02244	group_2665	28	315	0.0888889
Myco3a_04001	group_3026	113	1272	0.0888365
Myco3a_04492	ghrA	77	867	0.088812
Myco3a_04321	thiE	61	687	0.0887918
Myco3a_03436	mhpA_3	106	1194	0.0887772
Myco3a_02294	slyA_2	41	462	0.0887446
Myco3a_04299	thiD	74	834	0.088729
Myco3a_01121	rpfB	100	1128	0.0886525
Myco3a_01401	group_1391	113	1275	0.0886275
Myco3a_00871	group_1329	67	756	0.0886243
Myco3a_00213	gabR	127	1434	0.0885635
Myco3a_01926	group_1472	34	384	0.0885417
Myco3a_01487	group_17149	77	870	0.0885057
Myco3a_02895	bla	77	870	0.0885057
Myco3a_03208	ispG	103	1164	0.088488
Myco3a_04102	hpnE	122	1380	0.0884058
Myco3a_03843	ephA_1	83	939	0.0883919
Myco3a_00442	acuR	57	645	0.0883721
Myco3a_04606	accA1_2	173	1959	0.0883104
Myco3a_01072	group_1155	116	1314	0.0882801
Myco3a_00416	resA_3	54	612	0.0882353
Myco3a_04405	group_395	153	1734	0.0882353
Myco3a_04140	betI_3	113	1281	0.0882123
Myco3a_00386	group_2235	119	1350	0.0881481
Myco3a_02861	aroC	110	1248	0.088141
Myco3a_04838	gloB_1	55	624	0.088141
Myco3a_04251	group_3092	124	1407	0.0881308
Myco3a_03696	group_1719	88	999	0.0880881
Myco3a_04297	mdtD_2	153	1737	0.0880829
Myco3a_00287	group_465	130	1476	0.0880759
Myco3a_03005	group_2818	65	738	0.0880759
Myco3a_01226	group_1368	174	1977	0.0880121
Myco3a_01838	fabD_2	80	909	0.0880088
Myco3a_04441	group_16337	99	1125	0.088
Myco3a_00817	group_2335	167	1899	0.087941
Myco3a_00185	ycsE	72	819	0.0879121
Myco3a_00067	group_661	34	387	0.0878553
Myco3a_00251	group_2197	59	672	0.0877976
Myco3a_03398	ygaZ	64	729	0.0877915
Myco3a_04290	group_1802	79	900	0.0877778
Myco3a_01405	group_2464	104	1185	0.0877637
Myco3a_02431	cysW_2	70	798	0.0877193
Myco3a_04309	aguA_1	90	1026	0.0877193
Myco3a_02445	group_1538	86	981	0.0876656
Myco3a_03815	rimI	41	468	0.0876068
Myco3a_04005	yqjI	41	468	0.0876068
Myco3a_01706	group_2542	67	765	0.0875817
Myco3a_01529	phnF	62	708	0.0875706
Myco3a_04920	pdhC	109	1245	0.0875502
Myco3a_01840	aceE	245	2799	0.0875313
Myco3a_00301	group_2211	84	960	0.0875
Myco3a_03648	group_977	37	423	0.0874704
Myco3a_00202	embB	281	3213	0.0874572
Myco3a_00083	kshA_3	101	1155	0.0874459
Myco3a_00247	group_16936	139	1590	0.0874214
Myco3a_01729	group_16766	27	309	0.0873786
Myco3a_04691	gltA1	98	1122	0.087344
Myco3a_01308	group_17034	71	813	0.0873309
Myco3a_04613	group_3186	71	813	0.0873309
Myco3a_02933	group_1608	55	630	0.0873016
Myco3a_01830	group_2573	95	1089	0.087236
Myco3a_00735	rhaR	84	963	0.0872274
Myco3a_03042	group_2829	28	321	0.0872274
Myco3a_03738	upp	56	642	0.0872274
Myco3a_04933	group_17485	68	780	0.0871795
Myco3a_01097	group_2393	57	654	0.087156
Myco3a_00068	group_2163	109	1251	0.0871303
Myco3a_01808	group_2569	23	264	0.0871212
Myco3a_03665	algC	122	1401	0.0870807
Myco3a_00131	lcpB	82	942	0.0870488
Myco3a_02231	cocE_1	153	1758	0.0870307
Myco3a_03766	group_2984	59	678	0.0870206
Myco3a_02913	group_16721	89	1023	0.086999
Myco3a_01712	oxyE_1	109	1254	0.0869219
Myco3a_00065	narS	103	1185	0.0869198
Myco3a_01267	glpX	91	1047	0.086915
Myco3a_00591	mhpF	79	909	0.0869087
Myco3a_02982	group_1613	111	1278	0.0868545
Myco3a_03111	group_17507	118	1359	0.0868286
Myco3a_02012	rsmH	88	1014	0.086785
Myco3a_01979	group_2594	38	438	0.086758
Myco3a_04250	lprN_2	102	1176	0.0867347
Myco3a_00648	purD	110	1269	0.0866824
Myco3a_00142	group_724	39	450	0.0866667
Myco3a_01290	group_303	39	450	0.0866667
Myco3a_03602	rep_1	281	3243	0.0866482
Myco3a_03837	mycP4	125	1443	0.0866251
Myco3a_04154	group_3064	40	462	0.0865801
Myco3a_04511	efe	88	1017	0.086529
Myco3a_00383	group_748	109	1260	0.0865079
Myco3a_04688	prpR	123	1422	0.0864979
Myco3a_04150	group_3062	48	555	0.0864865
Myco3a_02280	cmtR	28	324	0.0864198
Myco3a_02966	group_2808	77	891	0.0864198
Myco3a_04952	parB	85	984	0.0863821
Myco3a_01205	group_16210	43	498	0.0863454
Myco3a_01737	era	79	915	0.0863388
Myco3a_03988	group_619	66	765	0.0862745
Myco3a_02853	ddn_3	37	429	0.0862471
Myco3a_02273	ansP1	128	1485	0.0861953
Myco3a_01207	mmsB_1	76	882	0.0861678
Myco3a_00300	menF_3	160	1857	0.0861605
Myco3a_00120	group_16951	46	534	0.0861423
Myco3a_03584	group_973	31	360	0.0861111
Myco3a_03673	glgC_2	93	1080	0.0861111
Myco3a_04821	group_1882	101	1173	0.086104
Myco3a_00699	group_1302	47	546	0.0860806
Myco3a_04583	group_17511	135	1569	0.0860421
Myco3a_01139	lpqT	56	651	0.0860215
Myco3a_02251	ssuB_2	64	744	0.0860215
Myco3a_04171	group_3070	104	1209	0.0860215
Myco3a_03308	aes_8	82	954	0.0859539
Myco3a_00327	group_2220	99	1152	0.0859375
Myco3a_00778	group_767	116	1350	0.0859259
Myco3a_02441	group_868	34	396	0.0858586
Myco3a_00575	group_2270	43	501	0.0858283
Myco3a_02865	group_16771	87	1014	0.0857988
Myco3a_03238	mmpS5_6	35	408	0.0857843
Myco3a_01235	dhbA_1	71	828	0.0857488
Myco3a_01250	coaA	80	933	0.0857449
Myco3a_03799	group_2105	98	1143	0.0857393
Myco3a_01743	zur	37	432	0.0856481
Myco3a_00632	group_2284	121	1413	0.0856334
Myco3a_01736	group_2551	28	327	0.0856269
Myco3a_00188	glf	103	1203	0.0856193
Myco3a_04328	pta	178	2079	0.0856181
Myco3a_02878	group_2796	228	2664	0.0855856
Myco3a_00079	hsaC_1	77	900	0.0855556
Myco3a_00302	group_2212	39	456	0.0855263
Myco3a_01731	dnaJ2	98	1146	0.0855148
Myco3a_00296	group_3721	139	1626	0.0854859
Myco3a_03817	tsaE	40	468	0.0854701
Myco3a_04571	group_17263	91	1065	0.085446
Myco3a_03320	thiL	81	948	0.085443
Myco3a_00328	rpsR1	21	246	0.0853659
Myco3a_04462	mch	42	492	0.0853659
Myco3a_02442	cinA	108	1266	0.0853081
Myco3a_01161	group_17163	76	891	0.0852974
Myco3a_03905	eutC_1	67	786	0.0852417
Myco3a_04135	group_1773	134	1572	0.0852417
Myco3a_00592	group_16999	92	1080	0.0851852
Myco3a_03811	groL2	138	1620	0.0851852
Myco3a_00368	egtC	58	681	0.0851689
Myco3a_01652	group_2527	93	1092	0.0851648
Myco3a_03904	group_17089	128	1503	0.085163
Myco3a_03882	pnbA_2	129	1515	0.0851485
Myco3a_03121	group_943	59	693	0.0851371
Myco3a_04873	group_1890	71	834	0.0851319
Myco3a_00144	serS	107	1257	0.0851233
Myco3a_01220	tdcB	107	1257	0.0851233
Myco3a_03475	ethR_2	48	564	0.0851064
Myco3a_01561	hcaB_2	73	858	0.0850816
Myco3a_01080	accA1_1	171	2010	0.0850746
Myco3a_00332	group_16605	101	1188	0.0850168
Myco3a_00712	mshD	76	894	0.0850112
Myco3a_02357	group_2694	89	1047	0.0850048
Myco3a_04871	group_1071	53	624	0.0849359
Myco3a_00695	ygfZ	93	1095	0.0849315
Myco3a_00143	group_49	41	483	0.0848861
Myco3a_00779	oatA	96	1131	0.0848806
Myco3a_03489	group_17292	96	1131	0.0848806
Myco3a_00212	dhmA2	70	825	0.0848485
Myco3a_01282	ychF	91	1074	0.08473
Myco3a_04570	group_3172	124	1464	0.0846995
Myco3a_04829	acr1_1	65	768	0.0846354
Myco3a_00073	group_1203	33	390	0.0846154
Myco3a_01914	group_2583	55	651	0.0844854
Myco3a_01021	group_2374	93	1101	0.0844687
Myco3a_00613	group_2279	77	912	0.0844298
Myco3a_01557	liaR	59	699	0.0844063
Myco3a_01271	xseA	104	1233	0.0843471
Myco3a_00196	group_16740	85	1008	0.0843254
Myco3a_04659	caiD_2	64	759	0.0843215
Myco3a_00452	cpo	67	795	0.0842767
Myco3a_02146	nuoG	201	2385	0.0842767
Myco3a_04922	bkdA	91	1080	0.0842593
Myco3a_02453	group_2710	46	546	0.0842491
Myco3a_00818	serC	94	1116	0.0842294
Myco3a_02872	group_17119	71	843	0.084223
Myco3a_02914	pimA	95	1128	0.0842199
Myco3a_04125	group_16715	74	879	0.0841866
Myco3a_00104	group_2171	104	1236	0.0841424
Myco3a_01754	drrA_1	79	939	0.0841321
Myco3a_04207	group_1788	106	1260	0.084127
Myco3a_01319	group_2108	28	333	0.0840841
Myco3a_00874	group_1332	58	690	0.084058
Myco3a_00464	group_2250	149	1773	0.0840384
Myco3a_00637	group_17328	63	750	0.084
Myco3a_00031	cwsA	34	405	0.0839506
Myco3a_01494	group_2495	77	918	0.083878
Myco3a_00686	gsiD	79	942	0.0838641
Myco3a_02444	group_869	80	954	0.0838574
Myco3a_00336	group_2222	82	978	0.0838446
Myco3a_03304	rsmD	42	501	0.0838323
Myco3a_03828	group_2994	127	1515	0.0838284
Myco3a_02099	pyrD	89	1062	0.0838041
Myco3a_00664	group_17355	139	1659	0.0837854
Myco3a_01203	group_17251	47	561	0.083779
Myco3a_04537	group_17289	155	1851	0.0837385
Myco3a_00841	group_2341	56	669	0.083707
Myco3a_02666	trpA	66	789	0.0836502
Myco3a_04879	group_17044	68	813	0.0836408
Myco3a_03055	group_17266	75	897	0.083612
Myco3a_04532	group_3160	75	897	0.083612
Myco3a_02984	group_577	83	993	0.0835851
Myco3a_01446	group_2485	99	1185	0.0835443
Myco3a_02651	group_1566	109	1305	0.0835249
Myco3a_03015	aftC	114	1365	0.0835165
Myco3a_00525	group_1279	43	516	0.0833333
Myco3a_00691	kshA_4	84	1008	0.0833333
Myco3a_01251	group_2433	103	1236	0.0833333
Myco3a_01272	group_2438	59	708	0.0833333
Myco3a_02331	ogt_1	42	504	0.0833333
Myco3a_02433	group_1921	84	1008	0.0833333
Myco3a_02740	group_1580	69	828	0.0833333
Myco3a_02808	group_16185	127	1524	0.0833333
Myco3a_02870	group_2794	27	324	0.0833333
Myco3a_03070	group_16719	57	684	0.0833333
Myco3a_04165	murB	87	1044	0.0833333
Myco3a_04262	group_3095	93	1116	0.0833333
Myco3a_04473	ybgK	73	876	0.0833333
Myco3a_04587	group_3177	98	1176	0.0833333
Myco3a_04600	yccU	35	420	0.0833333
Myco3a_04696	group_3206	35	420	0.0833333
Myco3a_04868	group_17553	13	156	0.0833333
Myco3a_02279	group_1515	150	1803	0.0831947
Myco3a_01414	group_2467	285	3426	0.0831874
Myco3a_04391	iniC	125	1503	0.083167
Myco3a_04327	ackA	93	1119	0.0831099
Myco3a_00033	glpG	72	867	0.083045
Myco3a_01469	prmC	70	843	0.0830368
Myco3a_01757	group_1444	138	1662	0.0830325
Myco3a_02103	uppP	69	831	0.0830325
Myco3a_01755	group_17187	64	771	0.0830091
Myco3a_04574	mmpL3_2	247	2976	0.0829973
Myco3a_04617	pcm	52	627	0.0829346
Myco3a_00349	group_1246	51	615	0.0829268
Myco3a_04579	group_3175	99	1194	0.0829146
Myco3a_00204	group_2186	96	1158	0.0829016
Myco3a_03470	group_2913	45	543	0.0828729
Myco3a_00340	asd	86	1038	0.0828516
Myco3a_04921	bkdB	81	978	0.0828221
Myco3a_03237	betI_13	80	966	0.0828157
Myco3a_00502	group_2257	79	954	0.0828092
Myco3a_04094	group_3054	77	930	0.0827957
Myco3a_03344	yhjE_4	112	1353	0.082779
Myco3a_02230	group_2661	36	435	0.0827586
Myco3a_01930	panB	70	846	0.0827423
Myco3a_04298	thiC	135	1632	0.0827206
Myco3a_03749	cdd	33	399	0.0827068
Myco3a_04917	baiA_2	61	738	0.0826558
Myco3a_03564	group_2022	29	351	0.0826211
Myco3a_03096	recA	86	1041	0.0826129
Myco3a_01342	group_17259	55	666	0.0825826
Myco3a_00472	group_2251	81	981	0.0825688
Myco3a_02784	zwf2	128	1551	0.0825274
Myco3a_04599	eis_2	102	1236	0.0825243
Myco3a_04149	ephD_4	76	921	0.082519
Myco3a_04465	argO	49	594	0.0824916
Myco3a_02475	group_334	24	291	0.0824742
Myco3a_00308	group_1238	116	1407	0.0824449
Myco3a_04816	mcl1_2	67	813	0.0824108
Myco3a_01146	group_1361	22	267	0.082397
Myco3a_00477	group_16472	43	522	0.0823755
Myco3a_01986	group_840	62	753	0.0823373
Myco3a_01781	group_16422	59	717	0.0822873
Myco3a_04312	nudL_1	59	717	0.0822873
Myco3a_02249	group_2668	115	1398	0.0822604
Myco3a_04348	purT_2	112	1362	0.082232
Myco3a_04779	group_1877	110	1338	0.0822123
Myco3a_03091	group_940	73	888	0.0822072
Myco3a_03108	group_17439	54	657	0.0821918
Myco3a_01984	trpD	88	1071	0.0821662
Myco3a_00892	group_16443	87	1059	0.082153
Myco3a_01967	group_1479	87	1059	0.082153
Myco3a_01448	soxC_1	104	1266	0.0821485
Myco3a_01572	group_1425	68	828	0.0821256
Myco3a_03663	manA	100	1218	0.0821018
Myco3a_02157	group_2644	115	1401	0.0820842
Myco3a_01059	fucA	65	792	0.0820707
Myco3a_03002	group_17356	143	1743	0.0820425
Myco3a_04572	trmB	63	768	0.0820312
Myco3a_04936	yfcA	63	768	0.0820312
Myco3a_03427	group_593	47	573	0.0820244
Myco3a_04870	group_1889	47	573	0.0820244
Myco3a_01941	group_16782	77	939	0.0820021
Myco3a_00717	qorA_2	76	927	0.0819849
Myco3a_04020	group_3033	30	366	0.0819672
Myco3a_01351	rocA1	134	1635	0.0819572
Myco3a_00553	amdA	103	1257	0.0819411
Myco3a_01317	group_1380	99	1209	0.0818859
Myco3a_01332	yjcS	155	1893	0.0818806
Myco3a_03491	lcfB_5	126	1539	0.0818713
Myco3a_04512	pknD	135	1650	0.0818182
Myco3a_04519	group_17293	78	954	0.081761
Myco3a_03071	nrdR	38	465	0.0817204
Myco3a_01215	aes_3	88	1077	0.0817084
Myco3a_02697	group_2754	100	1224	0.0816993
Myco3a_04373	group_3126	75	918	0.0816993
Myco3a_00786	moaE2_1	35	429	0.0815851
Myco3a_03967	devS	139	1704	0.0815728
Myco3a_00385	group_17238	81	993	0.081571
Myco3a_04785	group_1879	23	282	0.0815603
Myco3a_01747	auaH_1	80	981	0.0815494
Myco3a_02328	group_2688	91	1116	0.0815412
Myco3a_04953	soj_2	77	945	0.0814815
Myco3a_00089	atsK	76	933	0.0814577
Myco3a_04815	pknE	53	651	0.0814132
Myco3a_00687	gsiA_1	135	1659	0.0813743
Myco3a_03578	group_2930	41	504	0.0813492
Myco3a_01735	group_17161	107	1317	0.0812453
Myco3a_04237	group_1791	68	837	0.0812425
Myco3a_02241	eccB3_2	126	1551	0.0812379
Myco3a_04900	rplI	37	456	0.0811404
Myco3a_03314	recG	182	2244	0.0811052
Myco3a_01278	group_2441	18	222	0.0810811
Myco3a_03619	group_2941	99	1221	0.0810811
Myco3a_03569	group_17534	141	1740	0.0810345
Myco3a_02323	rlmB_3	61	753	0.0810093
Myco3a_03003	hmp_5	26	321	0.0809969
Myco3a_00580	group_2273	86	1062	0.0809793
Myco3a_03265	rimM	43	531	0.0809793
Myco3a_04630	fabG3	60	741	0.0809717
Myco3a_04284	cysNC_3	154	1902	0.0809674
Myco3a_00560	group_17527	94	1161	0.0809647
Myco3a_01231	group_17549	101	1248	0.0809295
Myco3a_00807	group_772	25	309	0.0809061
Myco3a_01158	group_2408	50	618	0.0809061
Myco3a_02876	group_2795	83	1026	0.0808967
Myco3a_02932	novR	66	816	0.0808824
Myco3a_03196	group_17282	152	1881	0.0808081
Myco3a_01701	group_16114	79	978	0.0807771
Myco3a_01119	metG	126	1560	0.0807692
Myco3a_01521	group_17321	118	1461	0.0807666
Myco3a_01624	group_519	39	483	0.0807453
Myco3a_01997	group_16292	31	384	0.0807292
Myco3a_01326	group_305	23	285	0.0807018
Myco3a_02419	group_17441	61	756	0.0806878
Myco3a_03948	mkl	91	1128	0.0806738
Myco3a_01294	ettA_1	143	1773	0.0806543
Myco3a_02224	group_2658	15	186	0.0806452
Myco3a_03135	ald_2	90	1116	0.0806452
Myco3a_02983	alc	82	1017	0.0806293
Myco3a_03437	group_2907	52	645	0.0806202
Myco3a_02866	aroE	66	819	0.0805861
Myco3a_01105	group_2396	51	633	0.0805687
Myco3a_03499	ubiG_2	58	720	0.0805556
Myco3a_03635	rsgA	79	981	0.0805301
Myco3a_02101	group_842	86	1068	0.0805243
Myco3a_01387	lpqY	114	1416	0.0805085
Myco3a_03683	birA	64	795	0.0805031
Myco3a_01441	group_806	140	1740	0.0804598
Myco3a_03235	group_587	42	522	0.0804598
Myco3a_00465	galE1	75	933	0.0803859
Myco3a_02804	group_2776	150	1866	0.0803859
Myco3a_02891	group_1602	34	423	0.0803783
Myco3a_02028	group_1483	27	336	0.0803571
Myco3a_02725	group_2762	101	1257	0.08035
Myco3a_03004	group_17483	73	909	0.080308
Myco3a_02421	ureB	26	324	0.0802469
Myco3a_02882	group_2798	58	723	0.0802213
Myco3a_03924	group_17568	109	1359	0.080206
Myco3a_04029	group_3036	32	399	0.0802005
Myco3a_01437	group_2479	83	1035	0.0801932
Myco3a_03759	trpS	83	1035	0.0801932
Myco3a_03819	alr	95	1185	0.0801688
Myco3a_01134	fabH_1	82	1023	0.0801564
Myco3a_00576	group_1283	31	387	0.0801034
Myco3a_00382	group_16598	30	375	0.08
Myco3a_01101	group_2395	18	225	0.08
Myco3a_02754	group_2768	48	600	0.08
Myco3a_02903	ruvA	48	600	0.08
Myco3a_04842	group_1887	54	675	0.08
Myco3a_03159	group_2848	89	1113	0.0799641
Myco3a_03033	group_933	35	438	0.0799087
Myco3a_04535	group_17550	29	363	0.0798898
Myco3a_01225	group_17170	23	288	0.0798611
Myco3a_01024	group_2375	80	1002	0.0798403
Myco3a_01702	group_17153	67	840	0.0797619
Myco3a_01102	group_791	22	276	0.0797101
Myco3a_01457	group_808	44	552	0.0797101
Myco3a_03589	group_1700	33	414	0.0797101
Myco3a_04911	ino1	87	1092	0.0796703
Myco3a_00567	group_2269	27	339	0.079646
Myco3a_01447	group_2486	209	2625	0.079619
Myco3a_04088	virS_1	80	1005	0.079602
Myco3a_03823	group_2992	69	867	0.0795848
Myco3a_02723	rsmA_2	42	528	0.0795455
Myco3a_04801	hdfR	68	855	0.0795322
Myco3a_01935	glnE	237	2982	0.0794769
Myco3a_00198	group_17229	425	5349	0.0794541
Myco3a_01535	group_813	71	894	0.0794183
Myco3a_01130	group_16657	131	1650	0.0793939
Myco3a_00225	mhqR	40	504	0.0793651
Myco3a_01354	group_2451	45	567	0.0793651
Myco3a_01661	mobA	45	567	0.0793651
Myco3a_01940	group_1474	40	504	0.0793651
Myco3a_02277	group_17450	105	1323	0.0793651
Myco3a_00562	group_2267	94	1185	0.0793249
Myco3a_04582	group_16557	84	1059	0.0793201
Myco3a_01463	thrB	73	921	0.0792617
Myco3a_04281	group_3453	73	921	0.0792617
Myco3a_04137	hcaB_3	68	858	0.0792541
Myco3a_01459	argS	131	1653	0.0792498
Myco3a_04698	lcfB_3	126	1590	0.0792453
Myco3a_00529	group_17395	29	366	0.079235
Myco3a_01337	fbiC	212	2676	0.0792227
Myco3a_00555	group_16889	101	1275	0.0792157
Myco3a_01680	group_2535	43	543	0.0791897
Myco3a_00503	panC	74	936	0.0790598
Myco3a_02827	fmt_1	73	924	0.0790043
Myco3a_02027	group_2608	59	747	0.0789826
Myco3a_02809	group_1594	103	1305	0.0789272
Myco3a_02176	fabH_2	80	1014	0.0788955
Myco3a_03911	mftD	93	1179	0.0788804
Myco3a_04475	group_3149	62	786	0.0788804
Myco3a_03423	group_1670	22	279	0.078853
Myco3a_00512	hmuU	83	1053	0.0788224
Myco3a_04389	group_1028	52	660	0.0787879
Myco3a_01501	dinG	160	2031	0.0787789
Myco3a_04831	poxB	137	1740	0.0787356
Myco3a_03340	group_2885	94	1194	0.078727
Myco3a_04222	group_17370	42	534	0.0786517
Myco3a_02128	group_1495	113	1437	0.078636
Myco3a_01410	mdtL	100	1272	0.0786164
Myco3a_03028	group_2828	58	738	0.0785908
Myco3a_02905	group_2802	45	573	0.078534
Myco3a_00541	psaA	69	879	0.0784983
Myco3a_03533	tetA	93	1185	0.078481
Myco3a_04146	group_3060	121	1542	0.0784695
Myco3a_01273	ispH2	76	969	0.0784314
Myco3a_01455	ydhP	96	1224	0.0784314
Myco3a_04148	aes_2	160	2040	0.0784314
Myco3a_04414	group_3134	63	804	0.0783582
Myco3a_01539	group_17094	55	702	0.0783476
Myco3a_04935	group_3266	43	549	0.0783242
Myco3a_01523	group_16460	264	3372	0.0782918
Myco3a_02731	mutA	143	1827	0.0782704
Myco3a_02116	group_846	27	345	0.0782609
Myco3a_00589	group_3722	126	1611	0.0782123
Myco3a_02824	ribD	80	1023	0.0782014
Myco3a_03912	mftC	95	1215	0.0781893
Myco3a_02929	group_915	68	870	0.0781609
Myco3a_01560	fadR_1	49	627	0.0781499
Myco3a_04153	mshA_1	104	1332	0.0780781
Myco3a_01835	accD6	111	1422	0.0780591
Myco3a_02908	group_17116	59	756	0.0780423
Myco3a_00875	mmpL4_2	224	2871	0.0780216
Myco3a_03220	group_2863	55	705	0.0780142
Myco3a_02389	group_17314	106	1359	0.0779985
Myco3a_04607	pccB	123	1578	0.0779468
Myco3a_02252	group_2669	209	2682	0.0779269
Myco3a_04510	group_3157	25	321	0.0778816
Myco3a_01129	ispE	74	951	0.0778128
Myco3a_03634	aroA	101	1299	0.0777521
Myco3a_00294	group_2209	139	1788	0.0777405
Myco3a_01913	ptpA	38	489	0.0777096
Myco3a_04336	group_3112	38	489	0.0777096
Myco3a_04031	bpoC	65	837	0.0776583
Myco3a_00032	ppiA	41	528	0.0776515
Myco3a_04577	group_3174	51	657	0.0776256
Myco3a_01078	dpgD_1	61	786	0.0776081
Myco3a_03640	group_2951	115	1482	0.0775978
Myco3a_02831	pucI_1	114	1470	0.077551
Myco3a_02677	hisF	60	774	0.0775194
Myco3a_03697	group_606	20	258	0.0775194
Myco3a_01508	mec	33	426	0.0774648
Myco3a_04335	moxC_1	82	1059	0.0774315
Myco3a_02877	group_17185	72	930	0.0774194
Myco3a_00006	gyrB	157	2028	0.0774162
Myco3a_00355	group_1248	52	672	0.077381
Myco3a_04152	group_17338	39	504	0.077381
Myco3a_03006	ubiB_5	106	1371	0.0773158
Myco3a_00200	group_2183	32	414	0.0772947
Myco3a_04939	group_17236	179	2316	0.0772884
Myco3a_03219	group_2862	73	945	0.0772487
Myco3a_00799	group_491	19	246	0.0772358
Myco3a_03139	hcaB_10	63	816	0.0772059
Myco3a_01292	cysK2	85	1101	0.0772025
Myco3a_02151	nuoL	144	1866	0.0771704
Myco3a_03164	yeeO	103	1335	0.0771536
Myco3a_02765	sufC	59	765	0.0771242
Myco3a_03345	group_17350	46	597	0.0770519
Myco3a_03570	fprA_1	104	1350	0.077037
Myco3a_00658	dapb1	164	2130	0.0769953
Myco3a_00469	group_16917	97	1260	0.0769841
Myco3a_04310	mdlY	154	2001	0.0769615
Myco3a_00387	group_16402	75	975	0.0769231
Myco3a_00671	group_1297	63	819	0.0769231
Myco3a_02681	hisB	48	624	0.0769231
Myco3a_02844	carA	87	1131	0.0769231
Myco3a_03202	cobQ	117	1521	0.0769231
Myco3a_03646	group_1711	48	624	0.0769231
Myco3a_00359	agaA	68	885	0.0768362
Myco3a_04132	group_1014	62	807	0.0768278
Myco3a_03754	group_609	41	534	0.076779
Myco3a_04467	xylB	82	1068	0.076779
Myco3a_00702	group_1303	120	1563	0.0767754
Myco3a_04228	moxC	102	1329	0.0767494
Myco3a_04324	group_16968	102	1329	0.0767494
Myco3a_02113	mshC	96	1251	0.0767386
Myco3a_03726	srmB	349	4548	0.076737
Myco3a_00474	group_17468	122	1590	0.0767296
Myco3a_04540	nagZ	87	1134	0.0767196
Myco3a_03793	rihA	84	1095	0.0767123
Myco3a_03845	cut3_2	55	717	0.0767085
Myco3a_04951	group_17449	55	717	0.0767085
Myco3a_01810	group_1455	23	300	0.0766667
Myco3a_04605	mmgC_2	89	1161	0.0766581
Myco3a_01655	fdhD	63	822	0.0766423
Myco3a_01504	pncB1	100	1305	0.0766284
Myco3a_02899	secF	97	1266	0.0766193
Myco3a_01688	octT	57	744	0.0766129
Myco3a_01082	group_17520	88	1149	0.0765883
Myco3a_02208	group_1509	88	1149	0.0765883
Myco3a_00851	group_2344	34	444	0.0765766
Myco3a_00191	group_16637	70	915	0.0765027
Myco3a_00449	group_16676	112	1464	0.0765027
Myco3a_02732	group_16704	56	732	0.0765027
Myco3a_03072	group_17140	39	510	0.0764706
Myco3a_02650	group_1565	77	1008	0.0763889
Myco3a_03881	group_381	154	2016	0.0763889
Myco3a_00133	menH_5	52	681	0.0763583
Myco3a_01149	mfd	279	3654	0.0763547
Myco3a_01524	paaF_2	60	786	0.0763359
Myco3a_04470	group_3145	30	393	0.0763359
Myco3a_01546	qacA_1	122	1599	0.0762977
Myco3a_01236	group_16897	92	1206	0.0762852
Myco3a_04212	group_3080	62	813	0.0762608
Myco3a_01341	group_2042	35	459	0.0762527
Myco3a_01109	group_2397	24	315	0.0761905
Myco3a_00108	group_1206	98	1287	0.0761461
Myco3a_04338	glnQ_1	58	762	0.0761155
Myco3a_00657	purC	68	894	0.0760626
Myco3a_01678	group_2534	47	618	0.0760518
Myco3a_00563	fabG2	60	789	0.0760456
Myco3a_01670	rne	216	2841	0.0760296
Myco3a_04864	group_3252	78	1026	0.0760234
Myco3a_04017	group_17467	122	1605	0.0760125
Myco3a_02443	group_1537	57	750	0.076
Myco3a_02166	lppK	44	579	0.0759931
Myco3a_04787	group_3232	132	1737	0.0759931
Myco3a_04339	group_3114	67	882	0.0759637
Myco3a_01074	purH	118	1554	0.0759331
Myco3a_00201	czcD_2	74	975	0.0758974
Myco3a_00001	dnaA	112	1476	0.0758808
Myco3a_01218	metB	89	1173	0.0758738
Myco3a_02857	group_2788	38	501	0.0758483
Myco3a_03114	group_1624	43	567	0.0758377
Myco3a_03179	cysG_2	91	1200	0.0758333
Myco3a_01403	sadH_2	63	831	0.0758123
Myco3a_03315	group_17508	126	1662	0.0758123
Myco3a_02020	murG	88	1161	0.0757967
Myco3a_01249	group_2432	30	396	0.0757576
Myco3a_03880	group_3005	40	528	0.0757576
Myco3a_02875	group_16694	87	1149	0.075718
Myco3a_02153	nuoN	121	1599	0.0756723
Myco3a_03768	folD	64	846	0.0756501
Myco3a_04326	pknG	177	2340	0.075641
Myco3a_04559	group_3168	59	780	0.075641
Myco3a_03941	group_385	27	357	0.0756303
Myco3a_04010	rhtB	49	648	0.0756173
Myco3a_04679	kasA_2	100	1323	0.0755858
Myco3a_00667	purQ	51	675	0.0755556
Myco3a_04347	group_1025	34	450	0.0755556
Myco3a_01565	ldtB	92	1218	0.0755337
Myco3a_03931	group_17143	46	609	0.0755337
Myco3a_01629	malL	120	1590	0.0754717
Myco3a_04136	group_16948	117	1551	0.0754352
Myco3a_04090	group_3053	26	345	0.0753623
Myco3a_00203	embA	248	3291	0.075357
Myco3a_03650	lpqB	132	1752	0.0753425
Myco3a_04235	group_3087	33	438	0.0753425
Myco3a_00665	group_16982	49	651	0.0752688
Myco3a_02247	yvoA	56	744	0.0752688
Myco3a_02871	group_16698	102	1356	0.0752212
Myco3a_04307	gabT	102	1356	0.0752212
Myco3a_00326	polC	74	984	0.0752033
Myco3a_04019	group_16779	74	984	0.0752033
Myco3a_01526	napA_1	168	2235	0.0751678
Myco3a_01164	group_16412	39	519	0.0751445
Myco3a_04869	group_1070	59	786	0.0750636
Myco3a_01704	group_2541	45	600	0.075
Myco3a_01988	group_17257	81	1080	0.075
Myco3a_03177	group_1638	27	360	0.075
Myco3a_03264	trmD	54	720	0.075
Myco3a_03990	group_3022	117	1560	0.075
Myco3a_03794	dinB_2	114	1521	0.0749507
Myco3a_04629	lcfB_4	116	1548	0.0749354
Myco3a_04456	group_17478	69	921	0.0749186
Myco3a_02436	crcB_1	35	468	0.0747863
Myco3a_00249	group_16306	142	1899	0.0747762
Myco3a_00419	ephA_3	72	963	0.0747664
Myco3a_01323	pimE_1	96	1284	0.0747664
Myco3a_01707	group_1436	72	963	0.0747664
Myco3a_00289	group_1236	41	549	0.0746812
Myco3a_02851	group_1598	41	549	0.0746812
Myco3a_04124	group_390	71	951	0.0746583
Myco3a_00599	group_1285	43	576	0.0746528
Myco3a_01492	group_16959	88	1179	0.0746395
Myco3a_04444	group_16938	163	2184	0.0746337
Myco3a_00338	group_1242	45	603	0.0746269
Myco3a_01388	sugA	68	912	0.0745614
Myco3a_02459	group_3532	34	456	0.0745614
Myco3a_04564	mmsB_2	68	912	0.0745614
Myco3a_02849	group_17182	91	1221	0.0745291
Myco3a_04469	group_1835	74	993	0.0745217
Myco3a_03118	rnj	126	1692	0.0744681
Myco3a_04694	group_3205	67	900	0.0744444
Myco3a_02365	act	48	645	0.0744186
Myco3a_02194	pafC	73	981	0.0744139
Myco3a_01718	sbpA	81	1089	0.0743802
Myco3a_00216	yegS_2	112	1506	0.0743692
Myco3a_01079	group_2387	87	1170	0.074359
Myco3a_01542	rutD_1	64	861	0.0743322
Myco3a_03229	pnuC	43	579	0.074266
Myco3a_01120	tatD	65	876	0.0742009
Myco3a_01095	gtaB	69	930	0.0741935
Myco3a_03190	ctpC	163	2199	0.0741246
Myco3a_00214	group_16986	32	432	0.0740741
Myco3a_00551	hsaB_2	42	567	0.0740741
Myco3a_00652	aspC_2	86	1161	0.0740741
Myco3a_01040	mutM	64	864	0.0740741
Myco3a_01556	group_2507	90	1215	0.0740741
Myco3a_03038	group_17307	48	648	0.0740741
Myco3a_03105	clgR	26	351	0.0740741
Myco3a_03605	atl	22	297	0.0740741
Myco3a_04264	paaF_3	60	810	0.0740741
Myco3a_04504	sdpR	22	297	0.0740741
Myco3a_04651	yqjG	76	1026	0.0740741
Myco3a_04678	group_17191	68	918	0.0740741
Myco3a_03839	group_17310	121	1635	0.0740061
Myco3a_03138	group_1626	113	1527	0.0740013
Myco3a_03210	dxr	85	1149	0.0739774
Myco3a_00378	group_16384	65	879	0.0739477
Myco3a_04502	group_3155	45	609	0.0738916
Myco3a_00215	group_16970	43	582	0.0738832
Myco3a_01745	group_17352	80	1083	0.0738689
Myco3a_01675	obg	107	1449	0.073844
Myco3a_03425	group_17188	35	474	0.0738397
Myco3a_00314	group_2215	33	447	0.0738255
Myco3a_02880	ddn_4	33	447	0.0738255
Myco3a_02710	ilvA	93	1260	0.0738095
Myco3a_02881	group_2797	73	990	0.0737374
Myco3a_04390	group_3658	48	651	0.0737327
Myco3a_03755	sigJ_2	67	909	0.0737074
Myco3a_02290	group_2678	63	855	0.0736842
Myco3a_04863	group_1068	19	258	0.0736434
Myco3a_01570	group_2513	70	951	0.0736067
Myco3a_00753	group_17560	85	1155	0.0735931
Myco3a_04834	ydaP	143	1944	0.0735597
Myco3a_02263	ectB	94	1278	0.0735524
Myco3a_00761	group_3288	77	1047	0.0735435
Myco3a_02335	pheT	182	2475	0.0735354
Myco3a_01568	orn	43	585	0.0735043
Myco3a_02317	group_1520	97	1320	0.0734848
Myco3a_00422	acsA_2	143	1947	0.0734463
Myco3a_00842	czcO	78	1062	0.0734463
Myco3a_00603	ftsH_2	163	2220	0.0734234
Myco3a_01070	ssuD_1	85	1158	0.0734024
Myco3a_03435	hcaB_1	72	981	0.0733945
Myco3a_03870	group_989	59	804	0.0733831
Myco3a_00558	group_17509	70	954	0.0733753
Myco3a_00486	group_16358	55	750	0.0733333
Myco3a_01373	group_2457	119	1623	0.073321
Myco3a_04367	pyrE	42	573	0.0732984
Myco3a_01230	baiA_1	62	846	0.0732861
Myco3a_04506	hcaB_5	51	696	0.0732759
Myco3a_02174	ilvG	127	1734	0.0732411
Myco3a_04488	prpB_1	56	765	0.0732026
Myco3a_00255	group_2200	27	369	0.0731707
Myco3a_02647	group_2738	108	1476	0.0731707
Myco3a_03325	cofC	45	615	0.0731707
Myco3a_03023	nhaA	95	1299	0.0731332
Myco3a_00497	folP1	77	1053	0.0731244
Myco3a_03364	group_17172	59	807	0.0731103
Myco3a_04538	group_17033	98	1341	0.0730798
Myco3a_00208	dprE2	57	780	0.0730769
Myco3a_03745	group_2979	73	999	0.0730731
Myco3a_02255	lgrB	319	4368	0.0730311
Myco3a_00616	rpoE	46	630	0.0730159
Myco3a_02781	cyoE	69	945	0.0730159
Myco3a_04874	group_3255	92	1260	0.0730159
Myco3a_02177	pat_1	76	1041	0.0730067
Myco3a_00128	group_723	60	822	0.0729927
Myco3a_02268	efeN_2	88	1206	0.0729685
Myco3a_03965	group_3019	51	699	0.0729614
Myco3a_00514	group_16666	58	795	0.072956
Myco3a_01064	uvrD1	179	2454	0.0729421
Myco3a_02349	group_17577	35	480	0.0729167
Myco3a_03228	group_16189	166	2277	0.0729029
Myco3a_00280	ligC	78	1071	0.0728291
Myco3a_03434	nrdF2	71	975	0.0728205
Myco3a_03485	group_2915	102	1401	0.0728051
Myco3a_00654	purB	100	1374	0.0727802
Myco3a_00782	group_17347	162	2226	0.0727763
Myco3a_04383	group_17432	62	852	0.07277
Myco3a_03318	group_17050	91	1251	0.0727418
Myco3a_02621	polA	197	2709	0.0727206
Myco3a_01107	group_17269	65	894	0.0727069
Myco3a_04484	phzD1	53	729	0.0727023
Myco3a_01415	lprE	41	564	0.072695
Myco3a_04436	group_16762	111	1527	0.0726916
Myco3a_03056	group_937	29	399	0.0726817
Myco3a_02819	metN	75	1032	0.0726744
Myco3a_03983	group_1750	17	234	0.0726496
Myco3a_02330	group_2689	56	771	0.0726329
Myco3a_04704	group_1866	78	1074	0.0726257
Myco3a_02990	group_2815	44	606	0.0726073
Myco3a_04581	group_16873	76	1047	0.0725883
Myco3a_00804	group_17082	59	813	0.0725707
Myco3a_04118	ephD_2	69	951	0.0725552
Myco3a_01954	lipB	47	648	0.0725309
Myco3a_02860	aroK	47	648	0.0725309
Myco3a_01498	glgE	151	2082	0.0725264
Myco3a_04120	group_16980	114	1572	0.0725191
Myco3a_01438	group_2480	15	207	0.0724638
Myco3a_03588	ylbL	75	1035	0.0724638
Myco3a_03715	sseA	65	897	0.0724638
Myco3a_02706	bioF	83	1146	0.0724258
Myco3a_02916	pgsA	48	663	0.0723982
Myco3a_01503	group_16877	43	594	0.0723906
Myco3a_02971	guaD	102	1410	0.0723404
Myco3a_03798	group_1734	92	1272	0.072327
Myco3a_04586	degU_2	49	678	0.0722714
Myco3a_01275	group_2440	13	180	0.0722222
Myco3a_04592	yceI	39	540	0.0722222
Myco3a_01151	group_1362	152	2106	0.0721747
Myco3a_02912	pdxS	66	915	0.0721311
Myco3a_01644	tig	106	1470	0.0721088
Myco3a_02422	ureC	125	1734	0.0720877
Myco3a_00086	group_17012	32	444	0.0720721
Myco3a_00113	ycnI	48	666	0.0720721
Myco3a_03698	group_1720	72	999	0.0720721
Myco3a_00312	hsaA_2	86	1194	0.0720268
Myco3a_00027	gyrA1	181	2514	0.0719968
Myco3a_04715	yngG	65	903	0.0719823
Myco3a_04708	group_16612	30	417	0.0719424
Myco3a_04568	pckG	131	1821	0.0719385
Myco3a_00066	mtr	101	1404	0.0719373
Myco3a_03867	group_988	82	1140	0.0719298
Myco3a_01998	group_17240	52	723	0.0719225
Myco3a_02722	dinB1	96	1335	0.0719101
Myco3a_01350	alaC	80	1113	0.0718778
Myco3a_03639	group_2950	36	501	0.0718563
Myco3a_00797	group_16368	53	738	0.0718157
Myco3a_03178	efpA	109	1518	0.071805
Myco3a_04302	pucR	109	1518	0.071805
Myco3a_03909	mftF	104	1449	0.0717736
Myco3a_00522	lcpA_3	110	1533	0.0717547
Myco3a_03590	group_16232	97	1353	0.0716925
Myco3a_03879	gdh_2	97	1353	0.0716925
Myco3a_00130	bfrB_2	40	558	0.0716846
Myco3a_02360	ppnK	66	921	0.0716612
Myco3a_03488	codB	95	1326	0.071644
Myco3a_01522	group_16586	52	726	0.0716253
Myco3a_04699	limB_1	90	1257	0.071599
Myco3a_03027	trkA_2	47	657	0.0715373
Myco3a_03672	group_2959	97	1356	0.0715339
Myco3a_02918	thrS	147	2055	0.0715328
Myco3a_03218	argP	62	867	0.071511
Myco3a_01383	group_17367	68	951	0.0715037
Myco3a_02171	group_1502	83	1161	0.0714901
Myco3a_04308	sad_1	104	1455	0.0714777
Myco3a_04796	dapb3	134	1875	0.0714667
Myco3a_01306	mmpL3_1	158	2211	0.0714609
Myco3a_00795	group_770	36	504	0.0714286
Myco3a_01651	desA3_2	84	1176	0.0714286
Myco3a_02893	group_17011	48	672	0.0714286
Myco3a_03736	punA	60	840	0.0714286
Myco3a_03921	group_16169	63	882	0.0714286
Myco3a_04112	group_17013	39	546	0.0714286
Myco3a_04300	group_1807	46	645	0.0713178
Myco3a_00678	group_1298	43	603	0.0713101
Myco3a_03214	rlmN	80	1122	0.0713012
Myco3a_03935	lprB_3	40	561	0.0713012
Myco3a_02476	katG	158	2217	0.0712675
Myco3a_02559	group_140	31	435	0.0712644
Myco3a_02271	yycB	90	1263	0.0712589
Myco3a_00764	dapC	84	1179	0.0712468
Myco3a_03633	yedK	56	786	0.0712468
Myco3a_01581	group_17072	97	1362	0.0712188
Myco3a_02432	modC	76	1068	0.071161
Myco3a_02450	group_870	19	267	0.071161
Myco3a_03305	mhpE	241	3387	0.0711544
Myco3a_03496	group_2916	197	2769	0.0711448
Myco3a_00246	group_2196	16	225	0.0711111
Myco3a_00630	group_2282	16	225	0.0711111
Myco3a_03287	kdpE	48	675	0.0711111
Myco3a_04089	group_1766	106	1491	0.0710932
Myco3a_02329	group_17436	71	999	0.0710711
Myco3a_04333	ntaA	97	1365	0.0710623
Myco3a_03205	group_951	26	366	0.0710383
Myco3a_04794	group_17579	52	732	0.0710383
Myco3a_02726	gltC_4	62	873	0.0710195
Myco3a_00283	group_17573	36	507	0.0710059
Myco3a_04624	group_17410	105	1479	0.0709939
Myco3a_01315	group_4016	92	1296	0.0709877
Myco3a_01376	group_16788	46	648	0.0709877
Myco3a_04408	group_3132	46	648	0.0709877
Myco3a_02709	glgX	152	2142	0.0709617
Myco3a_00305	group_2213	50	705	0.070922
Myco3a_00504	panD	30	423	0.070922
Myco3a_01640	group_16578	47	663	0.0708899
Myco3a_01075	bacA_1	131	1848	0.0708874
Myco3a_01374	btuD_1	64	903	0.0708749
Myco3a_02149	group_17290	54	762	0.0708661
Myco3a_00839	prrB_1	98	1383	0.0708604
Myco3a_04172	group_1780	122	1722	0.0708479
Myco3a_00844	group_17230	78	1101	0.0708447
Myco3a_01159	group_2409	34	480	0.0708333
Myco3a_03422	group_2904	85	1200	0.0708333
Myco3a_01413	group_2466	94	1329	0.0707299
Myco3a_00252	group_736	49	693	0.0707071
Myco3a_04340	group_3115	28	396	0.0707071
Myco3a_04945	cwlM	84	1188	0.0707071
Myco3a_04596	group_16900	197	2787	0.0706853
Myco3a_01069	group_16569	60	849	0.0706714
Myco3a_00854	group_1326	39	552	0.0706522
Myco3a_01635	pepN_1	181	2562	0.0706479
Myco3a_04016	sadH_3	61	864	0.0706019
Myco3a_04799	nei	54	765	0.0705882
Myco3a_04940	mviN	242	3429	0.0705745
Myco3a_02825	rpe	47	666	0.0705706
Myco3a_03176	proS	123	1743	0.070568
Myco3a_00250	group_17176	29	411	0.0705596
Myco3a_01336	group_17129	55	780	0.0705128
Myco3a_01633	group_16542	33	468	0.0705128
Myco3a_04375	group_17391	44	624	0.0705128
Myco3a_04604	group_639	66	936	0.0705128
Myco3a_03820	gadA	100	1419	0.0704722
Myco3a_00670	apeB	90	1278	0.0704225
Myco3a_03039	suhB	60	852	0.0704225
Myco3a_01681	rbsK_rbiA	61	867	0.0703576
Myco3a_00723	group_2313	46	654	0.0703364
Myco3a_02025	group_1482	50	711	0.0703235
Myco3a_01156	group_16916	54	768	0.0703125
Myco3a_02624	group_17142	31	441	0.0702948
Myco3a_03841	rhtA_1	74	1053	0.0702754
Myco3a_00381	group_1252	51	726	0.0702479
Myco3a_02216	bdhA_2	51	726	0.0702479
Myco3a_00182	gno	55	783	0.0702427
Myco3a_02253	mbtI	95	1353	0.0702143
Myco3a_02018	murD	103	1467	0.0702113
Myco3a_01985	group_17275	127	1809	0.0702045
Myco3a_00183	group_16348	56	798	0.0701754
Myco3a_00307	group_16497	92	1311	0.0701754
Myco3a_00615	group_2280	16	228	0.0701754
Myco3a_02370	group_17132	52	741	0.0701754
Myco3a_03306	group_1656	40	570	0.0701754
Myco3a_01382	group_16604	89	1269	0.070134
Myco3a_02764	csd	90	1284	0.0700935
Myco3a_03903	group_3009	90	1284	0.0700935
Myco3a_03085	group_583	33	471	0.0700637
Myco3a_02213	hutI	112	1599	0.0700438
Myco3a_04248	group_3090	50	714	0.070028
Myco3a_04536	group_17437	25	357	0.070028
Myco3a_04689	prpD	109	1557	0.0700064
Myco3a_01145	group_17110	21	300	0.07
Myco3a_00103	group_17260	59	843	0.0699881
Myco3a_01360	log	38	543	0.0699816
Myco3a_04956	yidC	76	1086	0.0699816
Myco3a_00540	group_2261	55	786	0.0699746
Myco3a_00343	group_2225	34	486	0.0699588
Myco3a_00777	group_2331	34	486	0.0699588
Myco3a_02199	group_2652	68	972	0.0699588
Myco3a_01219	group_16833	47	672	0.0699405
Myco3a_02170	group_2647	43	615	0.0699187
Myco3a_02430	modA	56	801	0.0699126
Myco3a_03774	group_1733	178	2547	0.0698861
Myco3a_04002	mpr	66	945	0.0698413
Myco3a_03580	menE_5	141	2019	0.0698366
Myco3a_00763	aes_1	75	1074	0.0698324
Myco3a_00298	dhbA_2	53	759	0.0698287
Myco3a_01566	group_16786	62	888	0.0698198
Myco3a_04856	group_1888	31	444	0.0698198
Myco3a_01208	fadB_1	72	1032	0.0697674
Myco3a_01370	glgM	81	1161	0.0697674
Myco3a_01955	group_17330	63	903	0.0697674
Myco3a_02456	serB1	54	774	0.0697674
Myco3a_03627	pdtaS	104	1491	0.0697518
Myco3a_04614	group_16794	50	717	0.069735
Myco3a_01627	group_2520	32	459	0.0697168
Myco3a_03866	group_3000	64	918	0.0697168
Myco3a_00653	group_16423	46	660	0.069697
Myco3a_02147	nuoH	89	1278	0.0696401
Myco3a_02661	tesB_1	52	747	0.0696118
Myco3a_01157	eno_1	90	1293	0.0696056
Myco3a_02886	pnbA_4	109	1566	0.0696041
Myco3a_00762	smtB_1	76	1092	0.0695971
Myco3a_00697	group_2301	43	618	0.0695793
Myco3a_03544	group_17031	110	1581	0.0695762
Myco3a_01114	rsmI	58	834	0.0695444
Myco3a_01558	group_16347	34	489	0.0695297
Myco3a_00141	group_3717	117	1683	0.0695187
Myco3a_00322	group_467	39	561	0.0695187
Myco3a_00727	group_764	64	921	0.0694897
Myco3a_01507	group_2498	69	993	0.0694864
Myco3a_00064	narL	45	648	0.0694444
Myco3a_03215	group_1641	45	648	0.0694444
Myco3a_04800	group_17446	70	1008	0.0694444
Myco3a_00480	group_17394	97	1398	0.0693848
Myco3a_03622	group_2942	77	1110	0.0693694
Myco3a_03854	mhpA_2	96	1386	0.0692641
Myco3a_00377	group_16227	59	852	0.0692488
Myco3a_02744	group_16152	70	1011	0.0692384
Myco3a_01730	hrcA	71	1026	0.0692008
Myco3a_02852	group_913	66	954	0.0691824
Myco3a_03066	group_1932	44	636	0.0691824
Myco3a_03771	group_983	22	318	0.0691824
Myco3a_04784	car_1	246	3558	0.06914
Myco3a_00423	oppA	112	1620	0.0691358
Myco3a_00675	purL	158	2286	0.0691164
Myco3a_04814	ftpA	34	492	0.0691057
Myco3a_00855	mdtD_1	142	2055	0.0690998
Myco3a_02158	group_2645	46	666	0.0690691
Myco3a_01579	group_16582	64	927	0.0690399
Myco3a_03341	leuB	70	1014	0.0690335
Myco3a_03359	asnC_2	35	507	0.0690335
Myco3a_03317	group_3610	53	768	0.0690104
Myco3a_02911	tesB_2	59	855	0.0690058
Myco3a_04101	nrdB	65	942	0.0690021
Myco3a_02654	cydB	71	1029	0.068999
Myco3a_00736	group_2318	48	696	0.0689655
Myco3a_02847	pyrB	66	957	0.0689655
Myco3a_02696	group_2753	37	537	0.0689013
Myco3a_01962	group_2592	118	1713	0.068885
Myco3a_04269	group_3452	82	1191	0.0688497
Myco3a_02369	scpB	51	741	0.0688259
Myco3a_04844	group_3247	51	741	0.0688259
Myco3a_01946	group_2589	32	465	0.0688172
Myco3a_02695	group_17525	91	1323	0.0687831
Myco3a_01234	group_17262	93	1353	0.0687361
Myco3a_04267	group_17213	68	990	0.0686869
Myco3a_04315	lpqL_2	103	1500	0.0686667
Myco3a_04623	sigG	69	1005	0.0686567
Myco3a_00518	group_17157	14	204	0.0686275
Myco3a_00366	egtA	85	1239	0.0686037
Myco3a_03803	group_16304	78	1137	0.0686016
Myco3a_01417	group_1396	82	1197	0.0685046
Myco3a_00689	amiC	97	1416	0.0685028
Myco3a_01697	group_17471	127	1854	0.0685005
Myco3a_00745	nlhH_2	61	891	0.0684624
Myco3a_01086	mprB	100	1461	0.0684463
Myco3a_02449	group_2709	31	453	0.0684327
Myco3a_02190	nylA	101	1476	0.0684282
Myco3a_00282	pimE_2	86	1257	0.0684169
Myco3a_01663	group_2531	47	687	0.0684134
Myco3a_02142	nuoC	47	687	0.0684134
Myco3a_02556	group_895	47	687	0.0684134
Myco3a_03399	group_366	24	351	0.0683761
Myco3a_02846	pyrC	89	1302	0.0683564
Myco3a_03664	group_17177	73	1068	0.0683521
Myco3a_00757	fatB	66	966	0.068323
Myco3a_01562	group_17340	99	1449	0.068323
Myco3a_01112	arcA	83	1215	0.0683128
Myco3a_03651	mtrB	118	1728	0.068287
Myco3a_04493	aam	95	1392	0.0682471
Myco3a_01700	group_17491	113	1656	0.0682367
Myco3a_03466	nrdE1	148	2169	0.0682342
Myco3a_00642	gltC_1	61	894	0.0682327
Myco3a_00685	dppB	70	1026	0.0682261
Myco3a_02212	group_851	35	513	0.0682261
Myco3a_02227	ssuA	70	1026	0.0682261
Myco3a_00358	group_743	44	645	0.0682171
Myco3a_01096	moeA1	89	1305	0.0681992
Myco3a_01091	mscL	27	396	0.0681818
Myco3a_01307	group_17567	45	660	0.0681818
Myco3a_04485	ahpD	36	528	0.0681818
Myco3a_01324	group_17412	55	807	0.0681537
Myco3a_02110	cysQ	56	822	0.0681265
Myco3a_04782	group_3231	28	411	0.0681265
Myco3a_00206	embC	220	3231	0.0680904
Myco3a_04523	adhB	77	1131	0.0680813
Myco3a_03353	ilvC	69	1014	0.0680473
Myco3a_01733	group_2550	71	1044	0.0680077
Myco3a_02226	ssuB_1	51	750	0.068
Myco3a_03723	gabD	106	1560	0.0679487
Myco3a_04560	group_17131	78	1149	0.0678851
Myco3a_03857	group_2997	56	825	0.0678788
Myco3a_01896	group_1467	45	663	0.0678733
Myco3a_02156	group_2643	46	678	0.0678466
Myco3a_02832	group_2782	69	1017	0.0678466
Myco3a_03565	mscS	70	1032	0.0678295
Myco3a_04384	resA_2	35	516	0.0678295
Myco3a_04955	group_16678	37	546	0.0677656
Myco3a_04263	group_17546	112	1653	0.0677556
Myco3a_03282	group_16254	51	753	0.0677291
Myco3a_00533	ispD	39	576	0.0677083
Myco3a_03804	guaB_1	104	1536	0.0677083
Myco3a_03936	caiD_1	52	768	0.0677083
Myco3a_00193	fbpC	66	975	0.0676923
Myco3a_00257	ycdF	53	783	0.0676884
Myco3a_00754	group_1310	68	1005	0.0676617
Myco3a_03357	group_16967	83	1227	0.0676447
Myco3a_03598	uvrD2	140	2070	0.0676329
Myco3a_04410	group_3133	28	414	0.0676329
Myco3a_00765	group_2326	29	429	0.0675991
Myco3a_03080	group_939	45	666	0.0675676
Myco3a_03162	group_2850	15	222	0.0675676
Myco3a_03690	group_2964	45	666	0.0675676
Myco3a_00526	radA	96	1422	0.0675105
Myco3a_04379	dnaJ1	80	1185	0.0675105
Myco3a_00792	moaA2	67	993	0.0674723
Myco3a_04314	lpqL_1	101	1497	0.0674683
Myco3a_03829	glmM	89	1320	0.0674242
Myco3a_02406	group_17361	125	1854	0.0674218
Myco3a_00539	znuB	56	831	0.0673887
Myco3a_04468	group_16990	39	579	0.0673575
Myco3a_03868	sppA	118	1752	0.0673516
Myco3a_04654	group_406	20	297	0.0673401
Myco3a_02163	desA1_2	62	921	0.0673181
Myco3a_00606	moaE2_2	87	1293	0.0672854
Myco3a_04194	aceA	87	1293	0.0672854
Myco3a_01646	clpP2	44	654	0.0672783
Myco3a_02348	menE_6	200	2973	0.0672721
Myco3a_00724	group_2314	68	1011	0.0672601
Myco3a_03276	glnD	160	2379	0.0672551
Myco3a_04365	rlmB_2	46	684	0.0672515
Myco3a_00139	group_17276	25	372	0.0672043
Myco3a_01695	group_2539	25	372	0.0672043
Myco3a_01113	pmt	104	1548	0.0671835
Myco3a_01281	group_17381	26	387	0.0671835
Myco3a_02896	relA	159	2367	0.0671736
Myco3a_01212	purT_1	80	1191	0.0671704
Myco3a_00544	group_16985	170	2532	0.0671406
Myco3a_02197	helY	184	2742	0.0671043
Myco3a_00798	group_16241	31	462	0.0670996
Myco3a_04179	group_3072	31	462	0.0670996
Myco3a_01200	group_16181	32	477	0.067086
Myco3a_04648	pntB	97	1446	0.0670816
Myco3a_02306	iolU	67	999	0.0670671
Myco3a_00772	group_16176	210	3132	0.0670498
Myco3a_01081	accD5_1	107	1596	0.0670426
Myco3a_03671	group_17168	37	552	0.067029
Myco3a_03844	cut3_1	37	552	0.067029
Myco3a_00342	group_2224	77	1149	0.0670148
Myco3a_04108	group_1012	85	1269	0.0669819
Myco3a_01346	fadH_1	136	2031	0.0669621
Myco3a_00044	rodA	96	1434	0.0669456
Myco3a_04937	cca	98	1464	0.0669399
Myco3a_00132	group_1210	51	762	0.0669291
Myco3a_04491	maiA	51	762	0.0669291
Myco3a_01933	caeB	103	1539	0.0669266
Myco3a_02678	impA	54	807	0.0669145
Myco3a_01974	asnB	124	1854	0.0668824
Myco3a_02673	mmpL4_8	190	2841	0.0668779
Myco3a_02318	lysX_2	224	3351	0.0668457
Myco3a_02898	group_16441	112	1677	0.0667859
Myco3a_00075	limC_1	56	840	0.0666667
Myco3a_01331	group_1384	24	360	0.0666667
Myco3a_01744	smtB_2	24	360	0.0666667
Myco3a_02029	group_841	31	465	0.0666667
Myco3a_02428	group_1534	68	1020	0.0666667
Myco3a_03075	mmgC_9	77	1155	0.0666667
Myco3a_03195	cobO	41	615	0.0666667
Myco3a_04156	group_17018	50	750	0.0666667
Myco3a_04663	group_3200	32	480	0.0666667
Myco3a_02209	cobN	241	3618	0.0666114
Myco3a_04611	tgs2	92	1383	0.0665221
Myco3a_00042	pknA	84	1263	0.0665083
Myco3a_04028	mgtA	76	1143	0.0664917
Myco3a_00256	ord_3	72	1083	0.066482
Myco3a_00604	group_16954	59	888	0.0664414
Myco3a_01654	group_820	49	738	0.0663957
Myco3a_03654	mgtC	48	723	0.06639
Myco3a_00458	group_2249	46	693	0.0663781
Myco3a_03358	group_16661	92	1386	0.0663781
Myco3a_04177	deoC	46	693	0.0663781
Myco3a_00718	phoU2	45	678	0.0663717
Myco3a_04924	group_3265	88	1326	0.066365
Myco3a_02133	group_2637	43	648	0.066358
Myco3a_04608	slmA_1	40	603	0.066335
Myco3a_04486	ahpC	39	588	0.0663265
Myco3a_00265	group_16159	38	573	0.0663176
Myco3a_03642	secA1	185	2790	0.0663082
Myco3a_02266	group_2674	109	1644	0.0663017
Myco3a_01141	glmU	96	1449	0.0662526
Myco3a_01464	rho	127	1917	0.0662493
Myco3a_04369	group_3125	31	468	0.0662393
Myco3a_01276	cstA	153	2310	0.0662338
Myco3a_03090	group_2836	30	453	0.0662252
Myco3a_01999	group_16550	86	1299	0.0662048
Myco3a_04908	group_657	52	786	0.0661578
Myco3a_02202	group_16650	48	726	0.0661157
Myco3a_04926	leuS	189	2859	0.066107
Myco3a_03294	rnc	47	711	0.0661041
Myco3a_00311	ethR_3	44	666	0.0660661
Myco3a_03864	group_2999	83	1257	0.0660302
Myco3a_00253	acrC_2	82	1242	0.0660225
Myco3a_00258	group_2201	41	621	0.0660225
Myco3a_01515	group_16294	41	621	0.0660225
Myco3a_04341	group_3116	41	621	0.0660225
Myco3a_00078	hsaA_1	78	1182	0.0659898
Myco3a_02250	group_853	58	879	0.0659841
Myco3a_02897	apt	38	576	0.0659722
Myco3a_03257	group_17223	19	288	0.0659722
Myco3a_01256	group_17049	55	834	0.0659472
Myco3a_01421	group_2471	55	834	0.0659472
Myco3a_01061	pgi	108	1638	0.0659341
Myco3a_02019	ftsW	104	1578	0.0659062
Myco3a_04239	gabD2	103	1563	0.0658989
Myco3a_00309	eno_2	84	1275	0.0658824
Myco3a_02708	group_17148	145	2202	0.0658492
Myco3a_02810	group_17452	31	471	0.0658174
Myco3a_01073	purN	46	699	0.0658083
Myco3a_00445	group_16257	152	2310	0.0658009
Myco3a_01538	group_16753	30	456	0.0657895
Myco3a_02185	ssuC_1	57	867	0.0657439
Myco3a_02724	ileS	211	3210	0.0657321
Myco3a_01949	pvdA	83	1263	0.0657165
Myco3a_02165	trmI	55	837	0.0657109
Myco3a_00700	group_2302	27	411	0.0656934
Myco3a_01150	mazG	65	990	0.0656566
Myco3a_04289	def	39	594	0.0656566
Myco3a_00608	group_2278	25	381	0.0656168
Myco3a_02022	ftsQ	62	945	0.0656085
Myco3a_02161	group_1498	62	945	0.0656085
Myco3a_00893	group_775	72	1098	0.0655738
Myco3a_04928	group_16723	24	366	0.0655738
Myco3a_04012	gpsA2	69	1053	0.0655271
Myco3a_00561	fadD3_2	103	1572	0.0655216
Myco3a_00450	group_16693	79	1206	0.0655058
Myco3a_01959	pepA	99	1512	0.0654762
Myco3a_03102	group_2840	11	168	0.0654762
Myco3a_01034	ku	53	810	0.0654321
Myco3a_00829	tdh_1	727	11112	0.0654248
Myco3a_01358	group_2453	62	948	0.0654008
Myco3a_00417	nudL_2	50	765	0.0653595
Myco3a_02417	group_16840	50	765	0.0653595
Myco3a_03932	group_383	30	459	0.0653595
Myco3a_02135	metH	246	3765	0.0653386
Myco3a_02218	group_1510	59	903	0.0653378
Myco3a_02787	group_1590	49	750	0.0653333
Myco3a_01512	murI	58	888	0.0653153
Myco3a_02286	group_17160	29	444	0.0653153
Myco3a_04598	group_3181	29	444	0.0653153
Myco3a_03765	group_2983	48	735	0.0653061
Myco3a_03758	yhjD	67	1026	0.0653021
Myco3a_02448	group_17481	57	873	0.0652921
Myco3a_03451	sigK	38	582	0.0652921
Myco3a_00565	pcaF	75	1149	0.0652742
Myco3a_01483	murA	84	1287	0.0652681
Myco3a_01994	group_2597	28	429	0.0652681
Myco3a_04337	fliY	56	858	0.0652681
Myco3a_04157	group_3066	89	1365	0.0652015
Myco3a_03185	pks5	409	6273	0.0652001
Myco3a_00379	glpF	53	813	0.0651907
Myco3a_01088	group_16593	35	537	0.0651769
Myco3a_04374	group_1821	35	537	0.0651769
Myco3a_02021	murC	96	1473	0.0651731
Myco3a_02336	argC	68	1044	0.0651341
Myco3a_01375	group_2458	42	645	0.0651163
Myco3a_01210	bauC	98	1506	0.065073
Myco3a_00407	group_16530	73	1122	0.0650624
Myco3a_03660	alkB	80	1230	0.0650407
Myco3a_04205	group_16885	16	246	0.0650407
Myco3a_04841	group_649	24	369	0.0650407
Myco3a_02372	der	91	1401	0.0649536
Myco3a_03418	group_17111	45	693	0.0649351
Myco3a_00335	group_17258	67	1032	0.0649225
Myco3a_01541	group_1420	111	1710	0.0649123
Myco3a_00715	pstA1	59	909	0.0649065
Myco3a_01099	group_16935	65	1002	0.0648703
Myco3a_02818	metP	43	663	0.0648567
Myco3a_01466	group_16079	14	216	0.0648148
Myco3a_03944	cycA	91	1404	0.0648148
Myco3a_04304	maoI	126	1944	0.0648148
Myco3a_00820	fprB	109	1683	0.0647653
Myco3a_03084	miaB	105	1623	0.064695
Myco3a_00045	pstP	98	1515	0.0646865
Myco3a_02168	mpa	117	1809	0.0646766
Myco3a_04270	group_3098	26	402	0.0646766
Myco3a_04403	aspC_1	83	1284	0.0646417
Myco3a_00598	group_17081	19	294	0.0646259
Myco3a_00774	otcC	95	1470	0.0646259
Myco3a_02367	group_16616	57	882	0.0646259
Myco3a_02008	lppM	44	681	0.0646109
Myco3a_01237	group_2427	37	573	0.0645724
Myco3a_02337	argJ	78	1209	0.0645161
Myco3a_02749	group_17326	36	558	0.0645161
Myco3a_01422	group_17532	82	1272	0.0644654
Myco3a_02858	aroQ	28	435	0.0643678
Myco3a_02869	alaS	173	2688	0.0643601
Myco3a_04529	sbp	72	1119	0.0643432
Myco3a_01450	fabR_1	44	684	0.0643275
Myco3a_03621	gpm2	38	591	0.0642978
Myco3a_01942	group_17162	27	420	0.0642857
Myco3a_02848	pyrR	37	576	0.0642361
Myco3a_00701	degU_1	42	654	0.0642202
Myco3a_02683	hisD	88	1371	0.0641867
Myco3a_01727	sir	108	1683	0.0641711
Myco3a_02186	group_17506	66	1029	0.0641399
Myco3a_04905	ponA1	152	2370	0.064135
Myco3a_00660	xylE	90	1404	0.0641026
Myco3a_01442	group_1399	40	624	0.0641026
Myco3a_03906	eutB_1	90	1404	0.0641026
Myco3a_04503	group_17543	10	156	0.0641026
Myco3a_04505	group_17010	30	468	0.0641026
Myco3a_03012	zapE	69	1077	0.0640669
Myco3a_01931	group_16591	88	1374	0.0640466
Myco3a_04685	ubiE_4	39	609	0.0640394
Myco3a_02405	gcvP	184	2874	0.0640223
Myco3a_01400	group_17537	82	1281	0.0640125
Myco3a_03366	gatB	96	1500	0.064
Myco3a_04353	group_3120	43	672	0.0639881
Myco3a_02143	nuoD	83	1299	0.0638953
Myco3a_00696	group_2300	55	861	0.0638792
Myco3a_04229	mtcA1	32	501	0.0638723
Myco3a_03797	nreC	41	642	0.0638629
Myco3a_01481	group_2492	27	423	0.0638298
Myco3a_04840	group_3246	54	846	0.0638298
Myco3a_01741	uppS_2	58	909	0.0638064
Myco3a_04931	group_17516	40	627	0.0637959
Myco3a_00683	group_16562	62	972	0.063786
Myco3a_01111	group_2398	31	486	0.063786
Myco3a_01552	group_309	53	831	0.0637786
Myco3a_00720	dus	75	1176	0.0637755
Myco3a_00284	lucA	44	690	0.0637681
Myco3a_03120	thyX	48	753	0.063745
Myco3a_00584	group_16203	74	1161	0.0637382
Myco3a_02138	hisG	56	879	0.0637088
Myco3a_03964	dagK	56	879	0.0637088
Myco3a_03073	lexA	43	675	0.0637037
Myco3a_04904	group_3258	103	1617	0.0636982
Myco3a_01684	group_16447	90	1413	0.0636943
Myco3a_02396	pgsA1	38	597	0.0636516
Myco3a_02152	nuoM	101	1587	0.0636421
Myco3a_04944	trxA	21	330	0.0636364
Myco3a_01543	group_16305	46	723	0.0636238
Myco3a_02222	group_16639	50	786	0.0636132
Myco3a_02145	nuoF	83	1305	0.0636015
Myco3a_01752	group_16328	33	519	0.0635838
Myco3a_01209	acrC_1	73	1149	0.0635335
Myco3a_02393	mmgC_7	81	1275	0.0635294
Myco3a_02796	group_3751	85	1338	0.0635277
Myco3a_00315	group_16872	52	819	0.0634921
Myco3a_01468	prfA	68	1071	0.0634921
Myco3a_04022	group_16940	28	441	0.0634921
Myco3a_04783	rhaS_2	28	441	0.0634921
Myco3a_03079	miaA	59	930	0.0634409
Myco3a_04585	group_3176	55	867	0.0634371
Myco3a_03242	xerC_4	58	915	0.063388
Myco3a_02900	secD	112	1767	0.0633843
Myco3a_00834	gltA2	81	1278	0.0633803
Myco3a_02627	livF	46	726	0.0633609
Myco3a_00353	amt	84	1326	0.0633484
Myco3a_03695	mmgC_1	80	1263	0.0633413
Myco3a_00640	group_2286	26	411	0.0632603
Myco3a_03348	bioI	78	1233	0.0632603
Myco3a_04193	fadB2	55	870	0.0632184
Myco3a_03763	megL	84	1329	0.0632054
Myco3a_02219	group_16434	191	3024	0.0631614
Myco3a_04406	dcd	36	570	0.0631579
Myco3a_02139	group_17472	25	396	0.0631313
Myco3a_04368	group_630	50	792	0.0631313
Myco3a_03209	rip1	78	1236	0.0631068
Myco3a_04531	betI_4	39	618	0.0631068
Myco3a_01768	davT_2	88	1395	0.0630824
Myco3a_03649	group_16736	123	1950	0.0630769
Myco3a_03324	gpsA	63	999	0.0630631
Myco3a_03587	group_16511	187	2967	0.0630266
Myco3a_01106	group_793	48	762	0.0629921
Myco3a_02634	group_1561	34	540	0.062963
Myco3a_03918	group_1744	54	858	0.0629371
Myco3a_04224	group_17108	27	429	0.0629371
Myco3a_03653	menE_2	101	1605	0.0629283
Myco3a_03612	moeZ	74	1176	0.0629252
Myco3a_01709	group_16439	124	1971	0.0629122
Myco3a_00617	rclC	30	477	0.0628931
Myco3a_04000	group_3025	96	1527	0.0628684
Myco3a_01682	proA	82	1305	0.0628352
Myco3a_04915	bbsG	81	1290	0.0627907
Myco3a_03069	group_16286	68	1083	0.0627886
Myco3a_00846	ctpE	151	2406	0.0627598
Myco3a_01152	efeB	77	1227	0.0627547
Myco3a_01443	group_2483	35	558	0.062724
Myco3a_03989	yraA	35	558	0.062724
Myco3a_04215	group_16580	79	1260	0.0626984
Myco3a_01355	dapD	60	957	0.0626959
Myco3a_00639	rcsC	94	1500	0.0626667
[truncated: 1,366 more rows]
